# Supplementary material for: Unravelling pathways downstream Sox6 induction in K562 erythroid cells by proteomic analysis
Source: Springer Nature journal article supplement (doi:10.1038/s41598-017-14336-6), 2017-10-20
Supplement: MOESM2 [file 41598_2017_14336_MOESM2_ESM.pdf]

**Unravelling pathways downstream Sox6 induction in K562 erythroid cells by proteomic analysis**

Gloria Barbarani, Antonella Ronchi, Margherita Ruoppolo, Lucia Santorelli, Robert Steinfeldler, Sudharshan Elangovan, Cristina Fugazza, Marianna Caterino

Supplemental Table 15. Details of mass spectrometry identifications

| # spot    | mass/charge | Precursor charge | Score     | # peptide | distinct peptide sequence | Peptide sequence average (%) : (ppm)                |                                            |
|-----------|-------------|------------------|-----------|-----------|---------------------------|-----------------------------------------------------|--------------------------------------------|
| 2449      | 639.7100    | 1277.4054        | 2         | 49        |                           | R.TIAMDGTGLVLR.G + Oxidation (M)                    |                                            |
|           | 701.2100    | 1400.4054        | 2         | 74        |                           | R.IMNVIGEPIDER.G + Oxidation (M)                    |                                            |
|           | 737.4200    | 1472.8254        | 2         | 14        |                           | K.TVLJIMELINNVAK.A + Oxidation (M)                  |                                            |
| 1682      | 415.2200    | 828.4254         | 2         | 24        | 11                        | R.ALLFIPR.R                                         |                                            |
|           | 540.7000    | 1079.3854        | 2         | 23        |                           | R.APFDFLENK.K                                       |                                            |
|           | 576.1800    | 1150.3454        | 2         | 47        |                           | K.YIDQELNK.T                                        |                                            |
|           | 597.7200    | 1193.4254        | 2         | 49        |                           | K.IDIIPNPQER.T                                      |                                            |
|           | 618.7400    | 1235.4654        | 2         | 42        |                           | R.RAPDFLENK.K                                       |                                            |
|           | 621.7600    | 1241.5054        | 2         | 42        |                           | K.ADLINNLGIAK.S                                     |                                            |
|           | 638.1800    | 1274.3454        | 2         | 60        |                           | R.ELISNASDALDK.I                                    |                                            |
|           | 656.0800    | 1310.1454        | 2         | 48        |                           | K.EDQTEYLEER.R                                      |                                            |
|           | 683.2800    | 1364.5454        | 2         | 78        |                           | R.TLTLVDTGIGMTK.A + Oxidation (M)                   |                                            |
|           | 924.1600    | 1846.3054        | 2         | 79        |                           | R.NPDDITQEEYGFYK.S                                  |                                            |
|           | 817.8600    | 2450.5582        | 3         | 11        |                           | R.YHTSQSGDEMTSLSEYVSRMK.E + Oxidation (M)           |                                            |
| 1902      | 422.7100    | 843.4054         | 2         | 49        | 6                         | K.VGEVIVTK.D                                        |                                            |
|           | 617.2300    | 1232.4454        | 2         | 51        |                           | K.VGGTSDVEVNEK.K                                    |                                            |
|           | 575.1000    | 1722.2782        | 3         | 10        |                           | K.DPGMGAMGGMGGGMGGMF.- + 3 Oxidation (M)            |                                            |
|           | 692.6300    | 2074.8682        | 3         | 11        |                           | K.EEKDPGMGAMGGMGGGMGGMF.- + Oxidation (M)           |                                            |
|           | 692.9600    | 2075.8582        | 3         | (9)       |                           | K.EEKDPGMGAMGGMGGGMGGMF.- + Oxidation (M)           |                                            |
|           | 708.7100    | 2123.1082        | 3         | (8)       |                           | K.EEKDPGMGAMGGMGGGMGGMF.- + 4 Oxidation (M)         |                                            |
| 2601      | 573.7300    | 1145.4454        | 2         | 47        | 2                         | K.LVFLGLDNAGK.T                                     |                                            |
|           | 438.8400    | 1313.4982        | 3         | 43        |                           | K.IDRPEAISEER.L                                     |                                            |
| 2049      | 487.1500    | 972.2854         | 2         | 20        | 5                         | K.LVPVGVGIR.K                                       |                                            |
|           | 650.2000    | 1298.3854        | 2         | 72        |                           | R.GVVQELQQAISK.L                                    |                                            |
|           | 673.7000    | 1345.3854        | 2         | 67        |                           | K.VGTDLLEEITK.F                                     |                                            |
|           | 679.7200    | 1357.4254        | 2         | 77        |                           | R.JASLEVENQSLR.G                                    |                                            |
|           | 771.6500    | 1541.2854        | 2         | 60        |                           | R.FYEQMNGPVAGASR.Q + Oxidation (M)                  |                                            |
| 2471      | 507.6900    | 1013.3654        | 2         | 23        | 3                         | R.DLTDYLMK.I + Oxidation (M)                        |                                            |
|           | 566.6200    | 1131.2254        | 2         | 44        |                           | R.GYSFTTAEER.E                                      |                                            |
|           | 580.9000    | 1159.7854        | 2         | 37        |                           | K.KITALAPSTMK.I                                     |                                            |
| 2420      | 416.2000    | 830.3854         | 2         | 26        | 8                         | R.VPFSLLR.G                                         |                                            |
|           | 459.1300    | 916.2454         | 2         | 41        |                           | K.DGVVEITGK.H                                       |                                            |
|           | 471.1700    | 940.3254         | 2         | 29        |                           | R.AQLGGPEAAK.S                                      |                                            |
|           | 573.7200    | 1145.4254        | 2         | 37        |                           | K.TKDGVEVITGK.H                                     |                                            |
|           | 582.1400    | 1162.2654        | 2         | 74        |                           | R.LFDQAFGLPR.L                                      |                                            |
|           | 548.5300    | 1642.5682        | 3         | 35        |                           | R.AQLGGPEAAKSDETAAK.-                               |                                            |
|           | 1038.5700   | 3112.6882        | 3         | 44        |                           | K.YTLPPGVDPQTQVSSSLSPGTLTVEAPMPK.L + Oxidation (M)  |                                            |
|           | 1081.5500   | 3241.6282        | 3         | 40        |                           | R.KYTLPPGVDPQTQVSSSLSPGTLTVEAPMPK.L + Oxidation (M) |                                            |
|           | 1962        | 466.1800         | 930.3454  | 2         | 42                        | 3                                                   | K.GPSSVEDIK.A                              |
|           |             | 748.2000         | 2241.5782 | 3         | (41)                      | 2                                                   | K.MSVQPTVSLGGFEITPPVVLRL.L + Oxidation (M) |
| 1121.9100 |             | 2241.8054        | 2         | 57        |                           | K.MSVQPTVSLGGFEITPPVVLRL.L + Oxidation (M)          |                                            |
| 1892      | 443.8100    | 885.6054         | 2         | 16        | 5                         | R.RLSELLR.Y                                         |                                            |
|           | 580.6900    | 1159.3654        | 2         | 43        |                           | K.SIYYITGESK.E                                      |                                            |
|           | 625.2200    | 1248.4254        | 2         | 46        |                           | K.EQVANSFAVER.V                                     |                                            |
|           | 625.2200    | 1248.4254        | 2         | (32)      |                           | K.EQVANSFAVER.V                                     |                                            |
|           | 757.3100    | 1512.6054        | 2         | 73        |                           | R.GVVDSLDLPLNISR.E                                  |                                            |
| 1892      | 618.2200    | 1234.4254        | 2         | 51        | 2                         | K.DQVANSFAVER.L                                     |                                            |
|           | 757.3100    | 1512.6054        | 2         | 73        |                           | R.GVVDSLDLPLNISR.E                                  |                                            |
| 1872      | 415.6400    | 829.2654         | 2         | 33        | 7                         | R.DLADVAAR.E                                        |                                            |
|           | 515.1600    | 1028.3054        | 2         | (40)      |                           | R.GVSVAVVGADR.V                                     |                                            |
|           | 515.2000    | 1028.3854        | 2         | 49        |                           | R.GVSVAVVGADR.V                                     |                                            |
|           | 525.6300    | 1049.2454        | 2         | (50)      |                           | R.TALTTISSR.D                                       |                                            |
|           | 525.6900    | 1049.3654        | 2         | 54        |                           | R.TALTTISSR.D                                       |                                            |
|           | 581.6800    | 1161.3454        | 2         | 53        |                           | K.VGTYQLAIVAK.H                                     |                                            |
|           | 719.0800    | 1436.1454        | 2         | 53        |                           | R.GSLQLDQLLPLK.Q                                    |                                            |
|           | 1872        | 508.1600         | 1014.3054 | 2         | 53                        | 4                                                   | K.DVNAAIATIK.T                             |
| 543.2200  | 1084.4254   | 2                | 39        |           | K.EIDLVLDR.I              |                                                     |                                            |
| 851.3600  | 1700.7054   | 2                | 56        |           | R.AVFVDLEPTVIDEVR.T       |                                                     |                                            |
| 1004.2300 | 2006.4454   | 2                | 10        |           | K.TIGGGDSFNTFFSETGAGK.H   |                                                     |                                            |
| 2140      | 565.6800    | 1129.3454        | 2         | 7         | 5                         | R.FPGQLNADLR.K                                      |                                            |
|           | 580.2600    | 1158.5054        | 2         | 50        |                           | K.LAVNMVPPFR.L + Oxidation (M)                      |                                            |
|           | 580.2600    | 1158.5054        | 2         | (50)      |                           | K.LAVNMVPPFR.L + Oxidation (M)                      |                                            |
|           | 668.2400    | 1334.4654        | 2         | 68        |                           | R.IMNTFSVVPSPK.V + Oxidation (M)                    |                                            |
|           | 816.2500    | 1630.4854        | 2         | 37        |                           | R.AILVDLEPGTMSVSR.S + Oxidation (M)                 |                                            |
| 1567      | 415.1400    | 828.2654         | 2         | 23        | 10                        | R.ALLFIPR.R                                         |                                            |
|           | 540.5500    | 1079.0854        | 2         | 23        |                           | R.APFDFLENK.K                                       |                                            |
|           | 580.6000    | 1159.1854        | 2         | 55        |                           | K.SIYYITGESK.E                                      |                                            |
|           | 618.5800    | 1235.1454        | 2         | 35        |                           | R.RAPDFLENK.K                                       |                                            |
|           | 625.0500    | 1248.0854        | 2         | (21)      |                           | K.EQVANSFAVER.V                                     |                                            |
|           | 625.0500    | 1248.0854        | 2         | (18)      |                           | K.EQVANSFAVER.V                                     |                                            |
|           | 625.0500    | 1248.0854        | 2         | (17)      |                           | K.EQVANSFAVER.V                                     |                                            |
|           | 625.0600    | 1248.1054        | 2         | 46        |                           | K.EQVANSFAVER.V                                     |                                            |
|           | 625.0700    | 1248.1254        | 2         | (39)      |                           | K.EQVANSFAVER.V                                     |                                            |
|           | 757.1300    | 1512.2454        | 2         | 71        |                           | R.GVVDSLDLPLNISR.E                                  |                                            |
| 1598      | 565.6100    | 1129.2054        | 2         | 11        | 5                         | R.FPGQLNADLR.K                                      |                                            |
|           | 580.1300    | 1158.2454        | 2         | 43        |                           | K.LAVNMVPPFR.L + Oxidation (M)                      |                                            |
|           | 668.2600    | 1334.5054        | 2         | (59)      |                           | R.IMNTFSVVPSPK.V + Oxidation (M)                    |                                            |
|           | 668.2600    | 1334.5054        | 2         | 63        |                           | R.IMNTFSVVPSPK.V + Oxidation (M)                    |                                            |
|           | 731.5700    | 1461.1254        | 2         | 46        |                           | K.EVDEQMLNVQNK.N + Oxidation (M)                    |                                            |
| 1131      | 487.1600    | 972.3054         | 2         | 36        | 6                         | K.QALEDLER.T                                        |                                            |
|           | 543.1900    | 1084.3654        | 2         | 52        |                           | R.LVSQLGELALR.S                                     |                                            |
|           | 573.1900    | 1144.3654        | 2         | 45        |                           | K.VAELGESDGR.R                                      |                                            |
|           | 616.6800    | 1231.3454        | 2         | 42        |                           | R.LSQEILGSTR.L                                      |                                            |
|           | 497.1600    | 1488.4582        | 3         | 17        |                           | R.SEQAVALEEKK.H                                     |                                            |
|           | 764.1700    | 1526.3254        | 2         | 4         |                           | K.VPQARMSGLVLGQR.D + Oxidation (M)                  |                                            |
| 1526      | 471.1400    | 940.2654         | 2         | 53        | 3                         | R.ALAEGVLLR.T                                       |                                            |
|           | 493.6300    | 985.2454         | 2         | 34        |                           | K.QQLEELAR.Q                                        |                                            |
|           | 514.6600    | 1027.3054        | 2         | 57        |                           | R.AIENELLAR.N                                       |                                            |
| 2298      | 481.1000    | 960.1854         | 2         | 31        | 4                         | R.SAGLFQNPQ.K                                       |                                            |
|           | 502.1300    | 1002.2454        | 2         | 16        |                           | R.FLQTPER.C                                         |                                            |
|           | 716.1500    | 1430.2854        | 2         | 69        |                           | R.SLIIDEGEDDLGR.G                                   |                                            |
|           | 874.8100    | 2621.4082        | 3         | 63        |                           | K.GMGSGQLQNLGAVALGPGPTVQGVVRF.F + Oxidation (M)     |                                            |
| 2316      | 664.6000    | 1327.1854        | 2         | 50        | 2                         | K.NSNPALNDNLEK.G                                    |                                            |
|           | 922.6400    | 1843.2654        | 2         | 66        |                           | K.LAALNPESNTAGLDIFAK.F                              |                                            |
| 2318      | 538.1700    | 1074.3254        | 2         | 29        | 5                         | K.QGQDNLSVVK.E                                      |                                            |
|           | 567.7000    | 1133.3854        | 2         | 50        |                           | K.SLNILTAFOQK.K                                     |                                            |
|           | 862.6900    | 1723.3654        | 2         | 61        |                           | K.ILDQGEDFPASEMTR.I + Oxidation (M)                 |                                            |
|           | 575.5000    | 1723.4782        | 3         | (43)      |                           | K.ILDQGEDFPASEMTR.I + Oxidation (M)                 |                                            |
|           | 575.7300    | 1724.1682        | 3         | (39)      |                           | K.ILDQGEDFPASEMTR.I + Oxidation (M)                 |                                            |
| 2318      | 531.1300    | 1060.2454        | 2         | 38        | 5                         | K.AAIIAEGDSK.A                                      |                                            |
|           | 531.6200    | 1061.2254        | 2         | 42        |                           | R.QVSDDLTER.A                                       |                                            |
|           | 531.6400    | 1061.2654        | 2         | (18)      |                           | R.QVSDDLTER.A                                       |                                            |
|           | 575.1100    | 1148.2054        | 2         | 50        |                           | R.FDAGELITQR.E                                      |                                            |
|           | 402.4800    | 1204.4182        | 3         | 25        |                           | R.FVVEKAEQQK.K                                      |                                            |
| 2173      | 406.6500    | 811.2854         | 2         | 31        | 9                         | R.DVFLYR.A                                          |                                            |
|           | 481.1500    | 960.2854         | 2         | 40        | 7                         | R.LVLQYAPSA.-                                       |                                            |
|           | 486.0900    | 970.1654         | 2         | 23        |                           | K.LRDLAR.K                                          |                                            |
|           | 509.1400    | 1016.2654        | 2         | 45        |                           | R.DSVIAELDR.E                                       |                                            |

|      |           |           |   |      |    |    |                                                   |    |     |
|------|-----------|-----------|---|------|----|----|---------------------------------------------------|----|-----|
|      | 768.6300  | 1535.2454 | 2 | (32) |    |    | R.DSIVAEALDREMSR.S + Oxidation (M)                |    |     |
|      | 512.8100  | 1535.4082 | 3 | 66   |    |    | R.DSIVAEALDREMSR.S + Oxidation (M)                |    |     |
|      | 699.5100  | 2095.5082 | 3 | 30   |    |    | M.APPAPGASGGSGEDELFDVK.N                          |    |     |
|      | 718.8800  | 2153.6182 | 3 | (55) |    |    | K.FGVVLDEIKPSSAPELQAVR.M                          |    |     |
|      | 718.8800  | 2153.6182 | 3 | 82   |    |    | K.FGVVLDEIKPSSAPELQAVR.M                          |    |     |
| 2014 | 484.6100  | 967.2054  | 2 | 39   | 6  | 6  | R.GNVGVFTK.E                                      | 29 | 366 |
|      | 609.0600  | 1216.1054 | 2 | 52   |    |    | K.IIQLDDYPK.C                                     |    |     |
|      | 657.1600  | 1312.3054 | 2 | 64   |    |    | K.TSFFQALGITTK.I                                  |    |     |
|      | 714.6600  | 1427.3054 | 2 | 44   |    |    | R.GTIEILSDVQLIK.T                                 |    |     |
|      | 948.1100  | 1894.2054 | 2 | 83   |    |    | R.VLALSIVETDYTFPLAEK.V                            |    |     |
|      | 917.8800  | 2750.6182 | 3 | 42   |    |    | K.AFLADPSAFVAAAPVAAATTAAPAAAAAPAK.V               |    |     |
| 976  | 437.0800  | 872.1454  | 2 | 30   | 14 | 12 | K.FADFMVK.D + Oxidation (M)                       | 18 | 291 |
|      | 457.1400  | 912.2654  | 2 | 24   |    |    | R.IJLYLTK.V                                       |    |     |
|      | 459.5200  | 917.0254  | 2 | 16   |    |    | K.ELSEALTR.H                                      |    |     |
|      | 474.5500  | 947.0854  | 2 | 18   |    |    | R.LLEFNQKG.L                                      |    |     |
|      | 492.7000  | 983.3854  | 2 | 66   |    |    | K.VGISPKLR.F                                      |    |     |
|      | 492.7200  | 983.4254  | 2 | (21) |    |    | K.VGISPKLR.F                                      |    |     |
|      | 555.6200  | 1109.2254 | 2 | 38   |    |    | K.GEFTIETEGK.T                                    |    |     |
|      | 555.6200  | 1109.2254 | 2 | (34) |    |    | K.GEFTIETEGK.T                                    |    |     |
|      | 624.1600  | 1246.3054 | 2 | 59   |    |    | K.TVNVVQFEPSK.G                                   |    |     |
|      | 634.6700  | 1267.3254 | 2 | 29   |    |    | R.YPLFEGQETGK.K                                   |    |     |
|      | 696.1500  | 1390.2854 | 2 | 60   |    |    | K.LPFAAAQIGNSFR.N                                 |    |     |
|      | 809.8400  | 1617.6654 | 2 | 17   |    |    | R.SSM <sup>M</sup> DGAGAEVLAPLR.L + Oxidation (M) |    |     |
|      | 543.0700  | 1626.1882 | 3 | 15   |    |    | K.TSYGWIEIVGCADR.S                                |    |     |
|      | 948.0200  | 2841.0382 | 3 | 12   |    |    | K.TFIGPGGNMPGYLRPETAQGIFLNFK.R + Oxidation (M)    |    |     |
| 980  | 408.6600  | 815.3054  | 2 | 38   | 22 | 14 | K.VGM <sup>M</sup> QIPR.F + Oxidation (M)         | 19 | 286 |
|      | 431.1000  | 860.1854  | 2 | 29   |    |    | R.LTEPMVNR.N + Oxidation (M)                      |    |     |
|      | 532.6600  | 1063.3054 | 2 | (20) |    |    | R.FEAPLFNAR.I                                     |    |     |
|      | 532.6700  | 1063.3254 | 2 | 37   |    |    | R.FEAPLFNAR.I                                     |    |     |
|      | 549.1100  | 1096.2054 | 2 | 40   |    |    | K.SATYVNTTEGR.A                                   |    |     |
|      | 578.1800  | 1154.3454 | 2 | 36   |    |    | R.LEEVSPNLVR.Y                                    |    |     |
|      | 591.0400  | 1180.0654 | 2 | (53) |    |    | R.VAGMLOSFGQK.D + Oxidation (M)                   |    |     |
|      | 591.1100  | 1180.2054 | 2 | (58) |    |    | R.VAGMLOSFGQK.D + Oxidation (M)                   |    |     |
|      | 591.1400  | 1180.2654 | 2 | (66) |    |    | R.VAGMLOSFGQK.D + Oxidation (M)                   |    |     |
|      | 591.1500  | 1180.2854 | 2 | 68   |    |    | R.VAGMLOSFGQK.D + Oxidation (M)                   |    |     |
|      | 625.5100  | 1249.0054 | 2 | 42   |    |    | K.DPYMTDSISR.A + Oxidation (M)                    |    |     |
|      | 685.5400  | 1369.0654 | 2 | (27) |    |    | R.GNDMQVGTYIEK.M + Oxidation (M)                  |    |     |
|      | 685.5900  | 1369.1654 | 2 | 33   |    |    | R.GNDMQVGTYIEK.M + Oxidation (M)                  |    |     |
|      | 685.6900  | 1369.3654 | 2 | (18) |    |    | R.GNDMQVGTYIEK.M + Oxidation (M)                  |    |     |
|      | 467.8500  | 1400.5282 | 3 | 39   |    |    | K.KPMVVLGSSALQR.N + Oxidation (M)                 |    |     |
|      | 475.8100  | 1424.4082 | 3 | (32) |    |    | R.NRLEEVSPNLVR.Y                                  |    |     |
|      | 475.8500  | 1424.5282 | 3 | 36   |    |    | R.NRLEEVSPNLVR.Y                                  |    |     |
|      | 764.7400  | 1527.4654 | 2 | 64   |    |    | R.NDGAAILAAVSSIAQK.I                              |    |     |
|      | 510.4700  | 1528.3882 | 3 | (15) |    |    | R.NDGAAILAAVSSIAQK.I                              |    |     |
|      | 804.7200  | 1607.4254 | 2 | 69   |    |    | R.FASEIAGVDDLTTGR.G                               |    |     |
|      | 1054.6700 | 2107.3254 | 2 | (40) |    |    | R.ALSEIAGMTLPYDTLDQVR.N + Oxidation (M)           |    |     |
|      | 703.5400  | 2107.5982 | 3 | 40   |    |    | R.ALSEIAGMTLPYDTLDQVR.N + Oxidation (M)           |    |     |
| 1080 | 431.6000  | 861.1854  | 2 | (20) | 34 | 20 | R.ETGVDLTK.D                                      | 34 | 313 |
|      | 431.6000  | 861.1854  | 2 | 21   |    |    | R.ETGVDLTK.D                                      |    |     |
|      | 459.0900  | 916.1654  | 2 | (10) |    |    | K.LFEMAYK.K + Oxidation (M)                       |    |     |
|      | 459.1300  | 916.2454  | 2 | 13   |    |    | K.LFEMAYK.K + Oxidation (M)                       |    |     |
|      | 479.5700  | 957.1254  | 2 | 20   |    |    | K.VLENAEGAR.T                                     |    |     |
|      | 616.0600  | 1230.1054 | 2 | 66   |    |    | R.QAASSLQASLK.L                                   |    |     |
|      | 621.6700  | 1241.3254 | 2 | 65   |    |    | K.DAGOISGLNVLV.V                                  |    |     |
|      | 621.6900  | 1241.3654 | 2 | (48) |    |    | K.DAGOISGLNVLV.V                                  |    |     |
|      | 645.7000  | 1289.3854 | 2 | 79   |    |    | K.VQQTVDLFR.A                                     |    |     |
|      | 681.2000  | 1360.3854 | 2 | 92   |    |    | R.AQFEGIVTDLIR.R                                  |    |     |
|      | 454.4700  | 1360.3882 | 3 | (51) |    |    | R.AQFEGIVTDLIR.R                                  |    |     |
|      | 725.6200  | 1449.2254 | 2 | 53   |    |    | R.TTPSVVAFTADGER.L                                |    |     |
|      | 725.6600  | 1449.3054 | 2 | (52) |    |    | R.TTPSVVAFTADGER.L                                |    |     |
|      | 484.1700  | 1449.4882 | 3 | (22) |    |    | R.TTPSVVAFTADGER.L                                |    |     |
|      | 731.6500  | 1461.2854 | 2 | 60   |    |    | K.SDIGEVILVGGMTR.M + Oxidation (M)                |    |     |
|      | 737.1500  | 1472.2854 | 2 | 63   |    |    | R.EQIVIQSSGGLSK.D                                 |    |     |
|      | 737.1500  | 1472.2854 | 2 | (61) |    |    | R.EQIVIQSSGGLSK.D                                 |    |     |
|      | 784.6300  | 1567.2454 | 2 | 75   |    |    | R.QAVTNPNTFYATK.R                                 |    |     |
|      | 523.7100  | 1568.1082 | 3 | 37   |    |    | K.LYSPSQIGAFVLMK.M + Oxidation (M)                |    |     |
|      | 785.2300  | 1568.4454 | 2 | (23) |    |    | K.LYSPSQIGAFVLMK.M + Oxidation (M)                |    |     |
|      | 531.5000  | 1591.4782 | 3 | (37) |    |    | K.LLGGFTLIGIPPAPR.G                               |    |     |
|      | 796.7500  | 1591.4854 | 2 | 40   |    |    | K.LLGGFTLIGIPPAPR.G                               |    |     |
|      | 796.7900  | 1591.5654 | 2 | (36) |    |    | K.LLGGFTLIGIPPAPR.G                               |    |     |
|      | 823.1600  | 1644.3054 | 2 | 98   |    |    | R.VINEPTAAALAYGLDK.S                              |    |     |
|      | 847.6200  | 1693.2254 | 2 | 41   |    |    | K.NAVITVPAYFNSQR.Q                                |    |     |
|      | 569.3600  | 1705.0582 | 3 | (42) |    |    | R.ETGVDLTKDNMALQR.V + Oxidation (M)               |    |     |
|      | 569.3600  | 1705.0582 | 3 | 44   |    |    | R.ETGVDLTKDNMALQR.V + Oxidation (M)               |    |     |
|      | 569.4300  | 1705.2682 | 3 | (24) |    |    | R.ETGVDLTKDNMALQR.V + Oxidation (M)               |    |     |
|      | 853.7100  | 1705.4054 | 2 | (24) |    |    | R.ETGVDLTKDNMALQR.V + Oxidation (M)               |    |     |
|      | 1028.6900 | 2055.3654 | 2 | 94   |    |    | K.STNGDTFLGGEDFDQALLR.H                           |    |     |
|      | 686.1300  | 2055.3682 | 3 | (43) |    |    | K.STNGDTFLGGEDFDQALLR.H                           |    |     |
|      | 702.0800  | 2103.2182 | 3 | 29   |    |    | R.VINEPTAAALAYGLDKSEDK.V                          |    |     |
|      | 811.8800  | 2432.6182 | 3 | 45   |    |    | R.EQIVIQSSGGLSKDIIENMVK.N + Oxidation (M)         |    |     |
|      | 813.1800  | 2436.5182 | 3 | 55   |    |    | K.AMQDAEVSKSDIGEVILVGGMTR.M + 2 Oxidation (M)     |    |     |
| 1080 | 402.6100  | 803.2054  | 2 | 24   | 25 | 19 | K.ITITNDK.G                                       | 33 | 285 |
|      | 495.1500  | 988.2854  | 2 | 41   |    |    | R.LSKEDIER.M                                      |    |     |
|      | 541.1100  | 1080.2054 | 2 | 28   |    |    | K.LLQDFNGK.E                                      |    |     |
|      | 590.6300  | 1179.2454 | 2 | 31   |    |    | K.VQVEYKGETK.S                                    |    |     |
|      | 600.1800  | 1198.3454 | 2 | (20) |    |    | K.DAGTIAGLNVLRI                                   |    |     |
|      | 600.2300  | 1198.4454 | 2 | 42   |    |    | K.DAGTIAGLNVLRI                                   |    |     |
|      | 407.7200  | 1220.1382 | 3 | 33   |    |    | R.AMTKDNLLGK.F + Oxidation (M)                    |    |     |
|      | 614.6300  | 1227.2454 | 2 | 58   |    |    | K.VEIANDQGNR.T                                    |    |     |
|      | 615.0100  | 1228.0054 | 2 | (4)  |    |    | K.VEIANDQGNR.T                                    |    |     |
|      | 627.1200  | 1252.2254 | 2 | 48   |    |    | R.FEELNADLFR.G                                    |    |     |
|      | 635.5000  | 1268.9854 | 2 | 53   |    |    | R.FDDAVVQSDMK.H + Oxidation (M)                   |    |     |
|      | 660.1000  | 1318.1854 | 2 | 72   |    |    | K.NSLESYAFNMKA.A + Oxidation (M)                  |    |     |
|      | 476.1200  | 1425.3382 | 3 | 44   |    |    | R.RFDDAVVQSDMK.H + Oxidation (M)                  |    |     |
|      | 494.1600  | 1479.4582 | 3 | 25   |    |    | R.RFEEELNADLFR.G                                  |    |     |
|      | 744.1700  | 1486.3254 | 2 | 77   |    |    | R.TTPSVVAFTDTER.L                                 |    |     |
|      | 817.1200  | 1632.2254 | 2 | 56   |    |    | K.SFYPEEVSSMVLTK.M + Oxidation (M)                |    |     |
|      | 830.1900  | 1658.3654 | 2 | 66   |    |    | R.IINEPTAAALAYGLDK.K                              |    |     |
|      | 555.7300  | 1664.1682 | 2 | (44) |    |    | K.NQVAMNPTNTVFDK.R + Oxidation (M)                |    |     |
|      | 833.3300  | 1664.6454 | 2 | 76   |    |    | K.NQVAMNPTNTVFDK.R + Oxidation (M)                |    |     |
|      | 833.5300  | 1665.0454 | 2 | (18) |    |    | K.NQVAMNPTNTVFDK.R + Oxidation (M)                |    |     |
|      | 833.6400  | 1665.2654 | 2 | (45) |    |    | K.NQVAMNPTNTVFDK.R + Oxidation (M)                |    |     |
|      | 564.4100  | 1690.2082 | 3 | 14   |    |    | K.STAGDTHLGGEDFDR.M                               |    |     |
|      | 991.1800  | 1980.3454 | 2 | (27) |    |    | K.TVTNAVTVPAYFNSQR.Q                              |    |     |
|      | 661.4800  | 1981.4182 | 3 | 44   |    |    | K.TVTNAVTVPAYFNSQR.Q                              |    |     |
|      | 1130.6600 | 2259.3054 | 2 | 79   |    |    | K.SINPDEAVYGAAVQAAILSGDK.S                        |    |     |
| 1273 | 486.5600  | 971.1054  | 2 | 39   | 20 | 13 | K.SSLGPVGLDK.M                                    | 29 | 312 |
|      | 486.5800  | 971.1454  | 2 | (22) |    |    | K.SSLGPVGLDK.M                                    |    |     |
|      | 573.6800  | 1145.3454 | 2 | 61   |    |    | R.YPVVSNILKA.A                                    |    |     |
|      | 574.2000  | 1146.3854 | 2 | 35   |    |    | R.EQLAIAEFAR.S                                    |    |     |
|      | 594.6700  | 1187.3254 | 2 | 22   |    |    | K.QAGVFEPTIVK.V                                   |    |     |

|      |           |           |   |      |  |    |  |    |  |                                            |    |     |
|------|-----------|-----------|---|------|--|----|--|----|--|--------------------------------------------|----|-----|
|      | 603.1900  | 1204.3654 | 2 | (52) |  |    |  |    |  | K.FATEAAITLR.I                             |    |     |
|      | 603.1900  | 1204.3654 | 2 | 57   |  |    |  |    |  | K.FATEAAITLR.I                             |    |     |
|      | 615.0900  | 1228.1654 | 2 | 45   |  |    |  |    |  | K.YFVEAGAMAVR.R + Oxidation (M)            |    |     |
|      | 616.1600  | 1230.3054 | 2 | 38   |  |    |  |    |  | R.ICDELIIUK.N                              |    |     |
|      | 511.4600  | 1531.3582 | 3 | (61) |  |    |  |    |  | R.SQNVMAAASIANIVK.S + Oxidation (M)        |    |     |
|      | 766.7200  | 1531.4254 | 2 | 94   |  |    |  |    |  | R.SQNVMAAASIANIVK.S + Oxidation (M)        |    |     |
|      | 773.7500  | 1545.4854 | 2 | 26   |  |    |  |    |  | R.DNKQAGVFPEITV.V                          |    |     |
|      | 881.6700  | 1761.3254 | 2 | 67   |  |    |  |    |  | R.YINENLIVNTEDELGR.D                       |    |     |
|      | 882.1600  | 1762.3054 | 2 | (30) |  |    |  |    |  | R.YINENLIVNTEDELGR.D                       |    |     |
|      | 641.5100  | 1921.5082 | 3 | (67) |  |    |  |    |  | K.LGVQVITDPEKLDQIR.Q                       |    |     |
|      | 641.5100  | 1921.5082 | 3 | 72   |  |    |  |    |  | K.LGVQVITDPEKLDQIR.Q                       |    |     |
|      | 1060.1800 | 2118.3454 | 2 | 99   |  |    |  |    |  | K.MLVDDIGDVTITNDGATILK.L + Oxidation (M)   |    |     |
|      | 707.1700  | 2118.4882 | 3 | (68) |  |    |  |    |  | K.MLVDDIGDVTITNDGATILK.L + Oxidation (M)   |    |     |
|      | 1176.7500 | 2351.4854 | 2 | (27) |  |    |  |    |  | R.SLLVIPNTLAVNAAQDSTDLVAK.L                |    |     |
|      | 1176.7600 | 2351.5054 | 2 | 53   |  |    |  |    |  | R.SLLVIPNTLAVNAAQDSTDLVAK.L                |    |     |
| 1376 | 503.1300  | 1004.2454 | 2 | 28   |  | 11 |  | 11 |  | K.FLDQNLQK.Y                               | 5  | 295 |
|      | 565.1900  | 1128.3654 | 2 | 61   |  |    |  |    |  | K.IEVLEELR.L                               |    |     |
|      | 570.1700  | 1138.3254 | 2 | 48   |  |    |  |    |  | R.AELIVQPELK.Y                             |    |     |
|      | 628.0500  | 1254.0854 | 2 | 57   |  |    |  |    |  | K.AITGFDDPFSGK.T                           |    |     |
|      | 511.0800  | 1530.2182 | 3 | 29   |  |    |  |    |  | R.LKNLTQTTEENLR.R                          |    |     |
|      | 769.7800  | 1537.5454 | 2 | 81   |  |    |  |    |  | R.LLEAQJATGGIHPK.E                         |    |     |
|      | 793.7500  | 1585.4854 | 2 | 61   |  |    |  |    |  | R.ALLQAILQTEMDLK.V                         |    |     |
|      | 802.1600  | 1602.3054 | 2 | 26   |  |    |  |    |  | K.SVEEVASEIQPFLR.G                         |    |     |
|      | 708.1200  | 2121.3382 | 3 | 24   |  |    |  |    |  | R.TMIQSPSQVILQEAADVHAR.Y                   |    |     |
|      | 811.8500  | 2432.5282 | 3 | 23   |  |    |  |    |  | K.AQQIHSQTSQQYPLYDL.DL.GK.F                |    |     |
|      | 1040.6200 | 3118.8382 | 3 | 51   |  |    |  |    |  | K.IGLVRPGTALLEEAQAATGFIVDPVSNLR.L          |    |     |
| 1438 | 539.0300  | 1076.0454 | 2 | 36   |  | 5  |  | 5  |  | K.LMPMQQIAN. - + 2 Oxidation (M)           | 13 | 380 |
|      | 550.5500  | 1099.0854 | 2 | 37   |  |    |  |    |  | K.DGSAVIAASKPR.E                           |    |     |
|      | 628.0800  | 1254.1454 | 2 | 67   |  |    |  |    |  | K.GMGGAMDLVSSAK.T + 2 Oxidation (M)        |    |     |
|      | 817.1100  | 1632.2054 | 2 | 88   |  |    |  |    |  | R.MVSSVYGENAEFER.Q + Oxidation (M)         |    |     |
|      | 807.4400  | 2419.2982 | 3 | 38   |  |    |  |    |  | K.ETVITLPGASFFSSDESFAMIR.G + Oxidation (M) |    |     |
| 1438 | 565.5900  | 1129.1654 | 2 | 54   |  | 3  |  | 3  |  | K.VTADVINAEEK.L                            | 7  | 393 |
|      | 673.1300  | 1344.2454 | 2 | 71   |  |    |  |    |  | K.GTIQVITOGTSLK.N                          |    |     |
|      | 744.5600  | 1487.1054 | 2 | 61   |  |    |  |    |  | R.AGTGVNDVLEAATR.K                         |    |     |
| 1456 | 438.6300  | 875.2454  | 2 | 28   |  | 18 |  | 14 |  | K.DEIDSAVK.X                               | 20 | 313 |
|      | 472.0700  | 942.1254  | 2 | 20   |  |    |  |    |  | R.ETRDVAPR.I                               |    |     |
|      | 500.6300  | 999.2454  | 2 | (42) |  |    |  |    |  | K.IDKELINR.I                               |    |     |
|      | 500.6300  | 999.2454  | 2 | 44   |  |    |  |    |  | K.IDKELINR.I                               |    |     |
|      | 596.1800  | 1190.3454 | 2 | 49   |  |    |  |    |  | K.GIDYDKLIVR.F                             |    |     |
|      | 701.1200  | 1400.2254 | 2 | 63   |  |    |  |    |  | K.DYTSGAMLTGELK.K + Oxidation (M)          |    |     |
|      | 702.6200  | 1403.2254 | 2 | 62   |  |    |  |    |  | K.AGNASKDEIDSAVK.X                         |    |     |
|      | 468.8900  | 1403.6482 | 3 | (48) |  |    |  |    |  | K.AGNASKDEIDSAVK.X                         |    |     |
|      | 727.9900  | 1453.9654 | 2 | 82   |  |    |  |    |  | R.DFNQVLDAVENK.K                           |    |     |
|      | 765.0900  | 1528.1654 | 2 | 62   |  |    |  |    |  | K.DYTSGAMLTGELK.A + Oxidation (M)          |    |     |
|      | 516.1600  | 1545.4582 | 3 | 6    |  |    |  |    |  | R.KDYTSGAVLTGELK.K                         |    |     |
|      | 855.1100  | 1708.2054 | 2 | 22   |  |    |  |    |  | K.EVTDEIVKEFMTPR.K + Oxidation (M)         |    |     |
|      | 863.1900  | 1724.3654 | 2 | 22   |  |    |  |    |  | K.EVTDEIVKEFYTPR.K                         |    |     |
|      | 600.8500  | 1799.5282 | 3 | (27) |  |    |  |    |  | K.MSASDPNSSIFLTDATAK.Q + Oxidation (M)     |    |     |
|      | 900.8700  | 1799.7254 | 2 | 90   |  |    |  |    |  | K.MSASDPNSSIFLTDATAK.Q + Oxidation (M)     |    |     |
|      | 901.1100  | 1800.2054 | 2 | 51   |  |    |  |    |  | K.FSASDPNSSIFLTDATAK.Q                     |    |     |
|      | 908.6200  | 1815.2254 | 2 | 82   |  |    |  |    |  | K.YSASDPNSSIFLTDATAK.Q                     |    |     |
|      | 606.0900  | 1815.2482 | 3 | (16) |  |    |  |    |  | K.YSASDPNSSIFLTDATAK.Q                     |    |     |
| 1500 | 424.6700  | 847.3254  | 2 | 29   |  | 10 |  | 7  |  | K.AFEPATGR.V                               | 13 | 298 |
|      | 543.1200  | 1084.2254 | 2 | (39) |  |    |  |    |  | K.EVNLAQNAK.A                              |    |     |
|      | 543.1500  | 1084.2854 | 2 | 43   |  |    |  |    |  | K.EVNLAQNAK.A                              |    |     |
|      | 564.6500  | 1127.2854 | 3 | 83   |  |    |  |    |  | K.IGDPLLEDTR.M                             |    |     |
|      | 613.5700  | 1225.1254 | 2 | 27   |  |    |  |    |  | K.VSFTGSVPTGMK.I + Oxidation (M)           |    |     |
|      | 685.1900  | 1368.3654 | 2 | 21   |  |    |  |    |  | R.IKIGDPLLEDTR.M                           |    |     |
|      | 770.6700  | 1539.3254 | 2 | 76   |  |    |  |    |  | R.ANDTTFGLAAGVFTR.D                        |    |     |
|      | 514.1600  | 1539.4582 | 3 | (57) |  |    |  |    |  | R.ANDTTFGLAAGVFTR.D                        |    |     |
|      | 771.1700  | 1540.3254 | 2 | (69) |  |    |  |    |  | R.ANDTTFGLAAGVFTR.D                        |    |     |
|      | 644.7500  | 1931.2282 | 3 | 25   |  |    |  |    |  | R.VEPADASGTEKAFEPATGR.V                    |    |     |
| 1500 | 415.2000  | 828.3854  | 2 | 24   |  | 13 |  | 9  |  | R.ALLFIPR.R                                | 13 | 339 |
|      | 443.6300  | 885.2454  | 2 | 28   |  |    |  |    |  | R.RSELLE.R.Y                               |    |     |
|      | 576.0900  | 1150.1654 | 2 | 47   |  |    |  |    |  | K.YIDQELNK.T                               |    |     |
|      | 580.6200  | 1159.2254 | 2 | 48   |  |    |  |    |  | K.SIYVITGESK.E                             |    |     |
|      | 618.5600  | 1235.1054 | 2 | 38   |  |    |  |    |  | R.RAPFDLFENK.K                             |    |     |
|      | 625.0500  | 1248.0854 | 2 | (45) |  |    |  |    |  | K.EQVANSFAFVER.V                           |    |     |
|      | 625.1200  | 1248.2254 | 2 | (44) |  |    |  |    |  | K.EQVANSFAFVER.V                           |    |     |
|      | 625.5700  | 1249.1254 | 2 | 46   |  |    |  |    |  | K.EQVANSFAFVER.V                           |    |     |
|      | 505.1100  | 1512.3082 | 3 | (49) |  |    |  |    |  | R.GVVSEDLPLNISR.E                          |    |     |
|      | 757.2000  | 1512.3854 | 2 | 67   |  |    |  |    |  | R.GVVSEDLPLNISR.E                          |    |     |
|      | 612.3700  | 1834.0882 | 3 | 7    |  |    |  |    |  | K.AQALRDNSTMGYMMAK.K + 3 Oxidation (M)     |    |     |
|      | 616.3800  | 1846.1182 | 3 | (26) |  |    |  |    |  | R.NPDDITQEEYGEFYK.S                        |    |     |
|      | 924.1300  | 1846.2454 | 2 | 65   |  |    |  |    |  | R.NPDDITQEEYGEFYK.S                        |    |     |
| 1500 | 596.7000  | 1191.3854 | 2 | 31   |  | 3  |  | 3  |  | K.AKPAEAPAAAPK.A                           | 8  | 265 |
|      | 712.6200  | 1423.2254 | 2 | 84   |  |    |  |    |  | R.NVEAMNFADIERT + Oxidation (M)            |    |     |
|      | 739.6600  | 1477.3054 | 2 | 53   |  |    |  |    |  | K.TPAFAEYSTEVDGR.W                         |    |     |
| 1500 | 471.1600  | 940.3054  | 2 | 52   |  | 3  |  | 3  |  | R.ALAEGVLLR.T                              | 5  | 343 |
|      | 493.5600  | 985.1054  | 2 | 21   |  |    |  |    |  | K.QQLEELAR.Q                               |    |     |
|      | 514.6300  | 1027.2454 | 2 | 43   |  |    |  |    |  | R.AIENELLAR.N                              |    |     |
| 1770 | 459.0900  | 916.1654  | 2 | 35   |  | 6  |  | 6  |  | K.LGELGTGVK.E                              | 14 | 344 |
|      | 467.6000  | 933.1854  | 2 | 25   |  |    |  |    |  | K.TIESETVR.T                               |    |     |
|      | 695.1200  | 1388.2254 | 2 | 50   |  |    |  |    |  | R.LLIDISASSTEQIL. -                        |    |     |
|      | 716.6500  | 1431.2854 | 2 | 64   |  |    |  |    |  | R.IILDINDVLDLAMGK.M + Oxidation (M)        |    |     |
|      | 719.0800  | 1436.1454 | 2 | 84   |  |    |  |    |  | K.TEMSEVLTEILR.V + Oxidation (M)           |    |     |
|      | 482.0700  | 1443.1882 | 3 | 42   |  |    |  |    |  | R.RLEESDVLQEAR.R                           |    |     |
| 1770 | 475.1400  | 948.2654  | 2 | 40   |  | 10 |  | 7  |  | R.LEAFLTQK.A                               | 18 | 312 |
|      | 492.1600  | 982.3054  | 2 | 35   |  |    |  |    |  | R.LNQPGTPTR.T                              |    |     |
|      | 499.0900  | 996.1654  | 2 | 16   |  |    |  |    |  | R.YPIPPDAK.E                               |    |     |
|      | 499.1000  | 996.1854  | 2 | (14) |  |    |  |    |  | R.YPIPPDAK.E                               |    |     |
|      | 527.6100  | 1053.2054 | 2 | (32) |  |    |  |    |  | K.RIPEELGK.V                               |    |     |
|      | 527.6500  | 1053.2854 | 2 | 56   |  |    |  |    |  | K.RIPEELGK.V                               |    |     |
|      | 651.1100  | 1300.2054 | 2 | 33   |  |    |  |    |  | R.ISELGAGGGVVTK.V                          |    |     |
|      | 441.4200  | 1321.2382 | 3 | 44   |  |    |  |    |  | K.VGELKDDDFER.I                            |    |     |
|      | 661.6600  | 1321.3054 | 2 | (20) |  |    |  |    |  | K.VGELKDDDFER.I                            |    |     |
|      | 671.2000  | 1340.3854 | 2 | 11   |  |    |  |    |  | R.DVKPSNILVNSR.G                           |    |     |
| 1382 | 410.6700  | 819.3254  | 2 | 30   |  | 7  |  | 6  |  | K.SNILVFK.L                                | 13 | 323 |
|      | 424.1200  | 846.2254  | 2 | 30   |  |    |  |    |  | R.AAGFNVL.R.L                              |    |     |
|      | 510.1500  | 1018.2854 | 2 | 38   |  |    |  |    |  | R.DILAVLTMK.R + Oxidation (M)              |    |     |
|      | 523.5800  | 1045.1454 | 2 | 45   |  |    |  |    |  | K.FVNPEDVAR.L                              |    |     |
|      | 523.6000  | 1045.1854 | 2 | (36) |  |    |  |    |  | K.FVNPEDVAR.L                              |    |     |
|      | 751.6300  | 1501.2454 | 2 | 28   |  |    |  |    |  | R.FTVLFPSTPLPAR.R                          |    |     |
|      | 1030.1500 | 2058.2854 | 2 | 65   |  |    |  |    |  | R.VTPAVVAYSENEIVGLAAK.Q                    |    |     |
| 1400 | 407.1100  | 812.2054  | 2 | 31   |  | 14 |  | 12 |  | K.FSFDLKG.G                                | 29 | 293 |
|      | 420.1000  | 838.1854  | 2 | 24   |  |    |  |    |  | K.FDSSLDR.K                                |    |     |
|      | 432.1100  | 862.2054  | 2 | 24   |  |    |  |    |  | K.QALLQYK.K                                |    |     |
|      | 459.1400  | 916.2654  | 2 | 36   |  |    |  |    |  | K.LEQSTIVK.E                               |    |     |
|      | 530.0300  | 1058.0454 | 2 | 37   |  |    |  |    |  | K.LYANMFER.L + Oxidation (M)               |    |     |
|      | 566.6100  | 1131.2054 | 2 | 48   |  |    |  |    |  | K.ALELDSNNEK.G                             |    |     |
|      | 578.6400  | 1155.2654 | 2 | 21   |  |    |  |    |  | K.FQIPPAELK.Y                              |    |     |

|      |           |           |   |      |    |    |  |  |                                                        |
|------|-----------|-----------|---|------|----|----|--|--|--------------------------------------------------------|
|      | 578.7100  | 1155.4054 | 2 | (21) |    |    |  |  | K.FQIPPAELK.Y                                          |
|      | 704.6700  | 1407.3254 | 2 | 46   |    |    |  |  | K.SNTAGSQSQVETE.A-                                     |
|      | 713.1000  | 1424.1854 | 2 | 26   |    |    |  |  | R.EGTGTEPMIGDR.V + 2 Oxidation (M)                     |
|      | 766.6000  | 1531.1854 | 2 | 64   |    |    |  |  | K.GEDLTEEDGGIIR.R                                      |
|      | 975.6500  | 1949.2854 | 2 | 54   |    |    |  |  | R.FEIGEGENLDLPYGLER.A                                  |
|      | 1050.7000 | 2099.3854 | 2 | (40) |    |    |  |  | K.ATESGAQSAPLMEGVDISPK.Q + Oxidation (M)               |
|      | 700.8200  | 2099.4382 | 3 | 54   |    |    |  |  | K.ATESGAQSAPLMEGVDISPK.Q + Oxidation (M)               |
| 1506 | 618.6100  | 1235.2054 | 2 | (30) | 6  | 5  |  |  | R.RAPDFLFENK.K                                         |
|      | 618.6200  | 1235.2254 | 2 | 41   |    |    |  |  | R.RAPDFLFENK.K                                         |
|      | 625.1000  | 1248.1854 | 2 | 48   |    |    |  |  | K.EQVANSFAFVER.V                                       |
|      | 674.5800  | 1347.1454 | 2 | 7    |    |    |  |  | K.HFSVEGQLEFR.A                                        |
|      | 470.1900  | 1407.5482 | 3 | 8    |    |    |  |  | K.EKYIDQELNK.T                                         |
|      | 757.1600  | 1512.3054 | 2 | 75   |    |    |  |  | R.GVVVSEDLPLNISR.E                                     |
| 1506 | 548.5800  | 1095.1454 | 2 | 30   | 6  | 6  |  |  | R.MMEVAAADVQ.Q + 2 Oxidation (M)                       |
|      | 617.1500  | 1232.2854 | 2 | 52   |    |    |  |  | K.TVFGVFPDLTR.E                                        |
|      | 843.7300  | 1685.4454 | 2 | 19   |    |    |  |  | K.LPDGSEIPLPILLGR.L                                    |
|      | 867.6600  | 1733.3054 | 2 | 37   |    |    |  |  | R.EGGSIPVTLTFOEATGK.N                                  |
|      | 648.2000  | 1941.5782 | 3 | 23   |    |    |  |  | K.QKLPDGSSEIPLPILLGR.L                                 |
|      | 740.8500  | 2219.5282 | 3 | 31   |    |    |  |  | R.LVPMNTPEVVGQVTSYLTK.K + Oxidation (M)                |
| 631  | 620.1200  | 1238.2254 | 2 | 46   | 7  | 7  |  |  | R.AFSDPFVEAEK.S                                        |
|      | 432.4600  | 1294.3582 | 2 | 42   |    |    |  |  | K.QDLPALEEKPR.N                                        |
|      | 661.1800  | 1320.3454 | 2 | 81   |    |    |  |  | K.VLATAFDTLGGR.K                                       |
|      | 748.0600  | 1494.1054 | 2 | 45   |    |    |  |  | R.AGGIETIANEYSDR.C                                     |
|      | 760.1600  | 1518.3054 | 2 | 55   |    |    |  |  | K.ELSTTLNAEAVTR.G                                      |
|      | 799.6600  | 1597.3054 | 2 | 108  |    |    |  |  | R.NFTTEQVTAMLLSK.L + Oxidation (M)                     |
|      | 635.1100  | 1902.3082 | 3 | 37   |    |    |  |  | K.SNLAYDIVQLPTGLTGK.V                                  |
| 601  | 407.1600  | 812.3054  | 2 | 26   | 13 | 11 |  |  | K.NILGGVKA                                             |
|      | 414.6400  | 827.2654  | 2 | 17   |    |    |  |  | K.ATLPSPK.L                                            |
|      | 492.6400  | 983.2654  | 2 | 42   |    |    |  |  | R.DEFELFK.Q                                            |
|      | 625.5700  | 1249.1254 | 2 | 39   |    |    |  |  | R.AENYDIPSADR.H                                        |
|      | 652.6400  | 1303.2654 | 2 | 45   |    |    |  |  | R.LDQPMTEIVSR.V + Oxidation (M)                        |
|      | 808.7100  | 1615.4054 | 2 | 62   |    |    |  |  | K.QPAENVNQLTDPK.F                                      |
|      | 541.8300  | 1622.4682 | 3 | (54) |    |    |  |  | R.LAGTOPLEVLEAVQR.S                                    |
|      | 812.2800  | 1622.5454 | 2 | 74   |    |    |  |  | R.LAGTOPLEVLEAVQR.S                                    |
|      | 812.2800  | 1622.5454 | 2 | (16) |    |    |  |  | R.LAGTOPLEVLEAVQR.S                                    |
|      | 904.6600  | 1807.3054 | 2 | 53   |    |    |  |  | R.ALPAVQQNNLDEDLR.K                                    |
|      | 918.7100  | 1835.4054 | 2 | 9    |    |    |  |  | R.FEVGQLQPNGEEMTLK.Q + Oxidation (M)                   |
|      | 942.1700  | 1882.3254 | 2 | 52   |    |    |  |  | R.NEEDAELVALAQAVNAR.A                                  |
|      | 954.6700  | 1907.3254 | 2 | 42   |    |    |  |  | K.SLVASLAEPDFVVTDFAK.F                                 |
| 601  | 450.6200  | 899.2254  | 2 | 36   | 8  | 8  |  |  | R.LVSVLQNK.M                                           |
|      | 473.6100  | 945.2054  | 2 | 14   |    |    |  |  | R.SVLGEADQK.G                                          |
|      | 530.5500  | 1059.0854 | 2 | 50   |    |    |  |  | R.GLEVTDDSPK.Y                                         |
|      | 543.6900  | 1085.3654 | 2 | 43   |    |    |  |  | R.IVAVTGAEAQK.A                                        |
|      | 547.6300  | 1093.2454 | 2 | 47   |    |    |  |  | K.SIDTGMGLER.L + Oxidation (M)                         |
|      | 738.6600  | 1475.3054 | 2 | 16   |    |    |  |  | K.DIINEEVQFLK.T                                        |
|      | 756.1000  | 1510.1854 | 2 | 56   |    |    |  |  | K.GLVVDMDGFEER.K + Oxidation (M)                       |
|      | 572.1800  | 1713.5182 | 3 | 44   |    |    |  |  | R.TITVALADGGRPDNTGR.G                                  |
| 745  | 410.1600  | 818.3054  | 2 | 31   | 19 | 14 |  |  | K.GDIFLVR.G                                            |
|      | 474.1600  | 946.3054  | 2 | 46   |    |    |  |  | R.KGDFLVR.G                                            |
|      | 481.5300  | 961.0454  | 2 | (26) |    |    |  |  | R.ESIESEIR.R                                           |
|      | 481.6200  | 961.2254  | 2 | 28   |    |    |  |  | R.ESIESEIR.R                                           |
|      | 516.6400  | 1031.2654 | 2 | 47   |    |    |  |  | K.GDDLSTAILK.Q                                         |
|      | 525.1500  | 1048.2854 | 2 | 49   |    |    |  |  | K.DVDLEFLAK.M                                          |
|      | 534.1400  | 1066.2654 | 2 | 45   |    |    |  |  | K.MDELQLFR.G + Oxidation (M)                           |
|      | 538.1500  | 1074.2854 | 2 | 51   |    |    |  |  | K.LAGESESNLR.K                                         |
|      | 559.6200  | 1117.2254 | 2 | 15   |    |    |  |  | R.ESIESEIRR.E                                          |
|      | 586.6600  | 1171.3054 | 2 | 34   |    |    |  |  | R.GILLYPPGTGK.T                                        |
|      | 621.6500  | 1241.2854 | 2 | 30   |    |    |  |  | R.EVDIGIPDATGR.L                                       |
|      | 723.6200  | 1445.2254 | 2 | (57) |    |    |  |  | R.IVSQLLTMDGLK.Q + Oxidation (M)                       |
|      | 723.7000  | 1445.3854 | 2 | 76   |    |    |  |  | R.IVSQLLTMDGLK.Q + Oxidation (M)                       |
|      | 482.8100  | 1445.4082 | 3 | (13) |    |    |  |  | R.IVSQLLTMDGLK.Q + Oxidation (M)                       |
|      | 778.7000  | 1555.3854 | 2 | 50   |    |    |  |  | R.LDQLIPLPDEK.S                                        |
|      | 856.1000  | 1710.1854 | 2 | 51   |    |    |  |  | R.VINQILTEMDGMSTK.K + 2 Oxidation (M)                  |
|      | 1086.1000 | 2170.1854 | 2 | (33) |    |    |  |  | R.QTNPSAMEVEEDDPVPEIR.R + Oxidation (M)                |
|      | 724.4200  | 2170.2382 | 3 | 55   |    |    |  |  | R.QTNPSAMEVEEDDPVPEIR.R + Oxidation (M)                |
|      | 724.5000  | 2170.4782 | 3 | (40) |    |    |  |  | R.QTNPSAMEVEEDDPVPEIR.R + Oxidation (M)                |
| 1435 | 499.6100  | 997.2054  | 2 | 27   | 11 | 10 |  |  | K.NIGVDNPAKV                                           |
|      | 557.6200  | 1113.2254 | 2 | 29   |    |    |  |  | K.EAVAMESYAK.A + Oxidation (M)                         |
|      | 646.1100  | 1290.2054 | 2 | (59) |    |    |  |  | K.LIEEVMIGEDK.L + Oxidation (M)                        |
|      | 646.1500  | 1290.2854 | 2 | 66   |    |    |  |  | K.LIEEVMIGEDK.L + Oxidation (M)                        |
|      | 654.1500  | 1306.2854 | 2 | 59   |    |    |  |  | K.ILIANTGMDTDK.I + Oxidation (M)                       |
|      | 665.6400  | 1329.2654 | 2 | 72   |    |    |  |  | R.GATQQLDEAER.S                                        |
|      | 747.6500  | 1493.2854 | 2 | 56   |    |    |  |  | R.QDLMNIAGTTLSSK.L + Oxidation (M)                     |
|      | 759.1900  | 1516.3654 | 2 | 55   |    |    |  |  | R.LTSFIGAIAIGDLVKS                                     |
|      | 782.6800  | 1563.3454 | 2 | 57   |    |    |  |  | R.DASLMVTNDGATILK.N + Oxidation (M)                    |
|      | 956.8500  | 1911.6854 | 2 | 57   |    |    |  |  | K.LGGLSADSYLDEGFLDK.K                                  |
|      | 788.5700  | 2362.6882 | 3 | 30   |    |    |  |  | R.MLPTIADNAGYSADLVAQLR.A + Oxidation (M)               |
| 1013 | 459.5900  | 917.1654  | 2 | 21   | 13 | 12 |  |  | K.VLESDLK.K                                            |
|      | 493.6000  | 985.1854  | 2 | 22   |    |    |  |  | R.LTPEIER.M                                            |
|      | 614.6000  | 1227.1854 | 2 | 52   |    |    |  |  | R.VEIHANDQGNR.I                                        |
|      | 617.0800  | 1232.1454 | 2 | 46   |    |    |  |  | K.DAGTIAGLNVMR.I + Oxidation (M)                       |
|      | 665.1000  | 1328.1854 | 2 | 55   |    |    |  |  | K.FEELNMDLFR.S + Oxidation (M)                         |
|      | 699.1800  | 1396.3454 | 2 | 47   |    |    |  |  | K.ELEEIVQPIISK.L                                       |
|      | 730.6800  | 1459.3454 | 2 | 50   |    |    |  |  | K.SDIDEIVLVGSTR.I                                      |
|      | 776.7400  | 1551.4654 | 2 | 69   |    |    |  |  | K.TFAPEEISAMVLT.K.M + Oxidation (M)                    |
|      | 776.7400  | 1551.4654 | 2 | (68) |    |    |  |  | K.TFAPEEISAMVLT.K.M + Oxidation (M)                    |
|      | 783.6500  | 1565.2854 | 2 | 23   |    |    |  |  | R.ITPSYVAFTPEGER.L                                     |
|      | 830.1700  | 1658.3254 | 2 | 98   |    |    |  |  | R.IINEPTAAAIAYGLDK.R                                   |
|      | 839.1600  | 1676.3054 | 2 | 73   |    |    |  |  | K.NQLTSNPENTVFDAR.R                                    |
|      | 918.6300  | 1835.2454 | 2 | 75   |    |    |  |  | K.SQJFSTASDNQPTVTIK.V                                  |
| 1013 | 408.1300  | 814.2454  | 2 | 23   | 27 | 20 |  |  | K.ESPLLFK.F + Glu->pyro-Glu (N-term E)                 |
|      | 417.1100  | 832.2054  | 2 | (18) |    |    |  |  | K.ESPLLFK.F                                            |
|      | 444.1400  | 886.2654  | 2 | 21   |    |    |  |  | K.EALLQASR.D                                           |
|      | 447.6700  | 893.3254  | 2 | 26   |    |    |  |  | R.LFFLQVKE                                             |
|      | 480.1800  | 958.3454  | 2 | 14   |    |    |  |  | K.FVIKPIDK.K                                           |
|      | 481.1200  | 960.2254  | 2 | 45   |    |    |  |  | R.KESPLLFK.F                                           |
|      | 482.1500  | 962.2854  | 2 | 50   |    |    |  |  | R.ISQLEMAR.Q + Oxidation (M)                           |
|      | 494.0700  | 986.1254  | 2 | (51) |    |    |  |  | R.ALELEQER.K                                           |
|      | 494.0800  | 986.1454  | 2 | 51   |    |    |  |  | R.ALELEQER.K                                           |
|      | 494.1000  | 986.1854  | 2 | (32) |    |    |  |  | R.ALELEQER.K                                           |
|      | 494.1300  | 986.2454  | 2 | (51) |    |    |  |  | R.ALELEQER.K                                           |
|      | 523.0300  | 1044.0454 | 2 | (57) |    |    |  |  | K.ALTSELANAR.D                                         |
|      | 523.1400  | 1044.2654 | 2 | 75   |    |    |  |  | K.ALTSELANAR.D                                         |
|      | 523.1600  | 1044.3054 | 2 | (55) |    |    |  |  | K.ALTSELANAR.D                                         |
|      | 531.0500  | 1060.0854 | 2 | 31   |    |    |  |  | R.EKEELMER.L + Glu->pyro-Glu (N-term E); Oxidation (M) |
|      | 540.1100  | 1078.2054 | 2 | 29   |    |    |  |  | R.EDAVLEYLK.I                                          |
|      | 591.6400  | 1181.2654 | 2 | 68   |    |    |  |  | K.APDFVYAPR.L                                          |
|      | 595.5900  | 1189.1654 | 2 | (15) |    |    |  |  | K.AQMVQEDLEK.T                                         |
|      | 603.6000  | 1205.1854 | 2 | 61   |    |    |  |  | K.AQMVQEDLEK.T + Oxidation (M)                         |
|      | 616.1300  | 1230.2454 | 2 | 66   |    |    |  |  | K.AQQELEEQTR.R                                         |
|      | 666.5700  | 1331.1254 | 2 | 37   |    |    |  |  | R.KPDTIEVQQMK.A + Oxidation (M)                        |

|      |           |           |   |      |    |    |                                                |    |     |
|------|-----------|-----------|---|------|----|----|------------------------------------------------|----|-----|
|      | 680.1600  | 1358.3054 | 2 | 55   |    |    | K.KAQQELEEQR.R                                 |    |     |
|      | 744.6600  | 1487.3054 | 2 | 36   |    |    | R.RKPD <sup>T</sup> IEVQQM.K.A + Oxidation (M) |    |     |
|      | 496.8400  | 1487.4982 | 2 | (12) |    |    | R.RKPD <sup>T</sup> IEVQQM.K.A + Oxidation (M) |    |     |
|      | 860.1700  | 1718.3254 | 2 | 92   |    |    | K.TQEQLALEMAELTAR.I + Oxidation (M)            |    |     |
|      | 924.0900  | 1846.1654 | 2 | 67   |    |    | K.KTQEQLALEMAELTAR.I + Oxidation (M)           |    |     |
|      | 616.4900  | 1846.4482 | 3 | (10) |    |    | K.KTQEQLALEMAELTAR.I + Oxidation (M)           |    |     |
| 955  | 480.1800  | 958.3454  | 2 | 14   | 6  | 5  | K.FVIKPIDK.K                                   | 30 | 288 |
|      | 591.6400  | 1181.2654 | 2 | 68   |    |    | K.APDFVFPYAPR.L                                |    |     |
|      | 666.5700  | 1331.1254 | 2 | 37   |    |    | R.RKPD <sup>T</sup> IEVQQM.K.A + Oxidation (M) |    |     |
|      | 744.6600  | 1487.3054 | 2 | 36   |    |    | R.RKPD <sup>T</sup> IEVQQM.K.A + Oxidation (M) |    |     |
|      | 496.8400  | 1487.4982 | 3 | (12) |    |    | R.RKPD <sup>T</sup> IEVQQM.K.A + Oxidation (M) |    |     |
|      | 793.5300  | 2377.5682 | 3 | 6    |    |    | -GMVAQDLEMVGINFYFEIKN.K + Oxidation (M)        |    |     |
| 955  | 444.1700  | 886.3254  | 2 | 25   | 13 | 10 | K.EALLQASR.D                                   | 15 | 277 |
|      | 481.1200  | 960.2254  | 2 | 10   |    |    | R.KESPLLFK.F                                   |    |     |
|      | 482.1400  | 962.2654  | 2 | 50   |    |    | R.ISQLEMAR.Q + Oxidation (M)                   |    |     |
|      | 494.1100  | 986.2054  | 2 | 50   |    |    | R.ALELEQER.K                                   |    |     |
|      | 494.1500  | 986.2854  | 2 | (45) |    |    | R.ALELEQER.K                                   |    |     |
|      | 523.0900  | 1044.1654 | 2 | (9)  |    |    | K.ALTSSELANAR.D                                |    |     |
|      | 523.1700  | 1044.3254 | 2 | 54   |    |    | K.ALTSSELANAR.D                                |    |     |
|      | 603.6100  | 1205.2054 | 2 | 46   |    |    | K.AQM <sup>V</sup> QEDLEK.T + Oxidation (M)    |    |     |
|      | 616.0900  | 1230.1654 | 2 | 61   |    |    | K.AQQELEEQR.R                                  |    |     |
|      | 496.8300  | 1487.4682 | 3 | 29   |    |    | R.RKPD <sup>T</sup> IEVQQM.K.A + Oxidation (M) |    |     |
|      | 860.1600  | 1718.3054 | 2 | 60   |    |    | K.TQEQLALEMAELTAR.I + Oxidation (M)            |    |     |
|      | 573.8300  | 1718.4682 | 3 | (49) |    |    | K.TQEQLALEMAELTAR.I + Oxidation (M)            |    |     |
|      | 616.5000  | 1846.4782 | 3 | 46   |    |    | K.KTQEQLALEMAELTAR.I + Oxidation (M)           |    |     |
| 832  | 443.6800  | 885.3454  | 2 | (23) | 19 | 16 | R.RLSELLR.Y                                    | 25 | 343 |
|      | 443.6800  | 885.3454  | 2 | 23   |    |    | R.RLSELLR.Y                                    |    |     |
|      | 540.5600  | 1079.1054 | 2 | 23   |    |    | R.APFDLFENK.K                                  |    |     |
|      | 576.5700  | 1151.1254 | 2 | 47   |    |    | K.YIDQEELNK.T                                  |    |     |
|      | 597.6600  | 1193.3054 | 2 | 33   |    |    | K.IDIIPNPQER.T                                 |    |     |
|      | 618.5500  | 1235.0854 | 2 | 35   |    |    | R.RAPFDLFENK.K                                 |    |     |
|      | 621.6200  | 1241.2254 | 2 | 37   |    |    | K.ADLINNLGTIAK.S                               |    |     |
|      | 625.1200  | 1248.2254 | 2 | 34   |    |    | K.EQVANSAFVER.V                                |    |     |
|      | 638.0900  | 1274.1654 | 2 | (60) |    |    | R.ELISNASDALDK.I                               |    |     |
|      | 638.1000  | 1274.1854 | 2 | (19) |    |    | R.ELISNASDALDK.I                               |    |     |
|      | 638.1300  | 1274.2454 | 2 | 60   |    |    | R.ELISNASDALDK.I                               |    |     |
|      | 656.0400  | 1310.0654 | 2 | 45   |    |    | K.EDQTEYLEER.R                                 |    |     |
|      | 683.1500  | 1364.2854 | 2 | 71   |    |    | R.TLTLVDTGIGMTK.A + Oxidation (M)              |    |     |
|      | 708.6000  | 1415.1854 | 2 | 18   |    |    | K.EGLELEPEDEEEK.K                              |    |     |
|      | 747.5400  | 1493.0654 | 2 | 71   |    |    | K.IEDVGSDEEDDSGK.D                             |    |     |
|      | 757.1200  | 1512.2254 | 2 | 70   |    |    | R.GVVDSEDLPLNISR.E                             |    |     |
|      | 515.4000  | 1543.1782 | 3 | 11   |    |    | R.ELISNASDALDKIR.Y                             |    |     |
|      | 924.1500  | 1846.2854 | 2 | 76   |    |    | R.NPDDITQEYGEFYK.S                             |    |     |
|      | 1178.4000 | 3532.1782 | 3 | 74   |    |    | K.LGLGIDEVEAAEENPAVPEIPPLEGDEDEDASR.M          |    |     |
| 1162 | 451.6200  | 901.2254  | 2 | 12   | 12 | 8  | R.STLEPVEK.A                                   | 16 | 344 |
|      | 555.5800  | 1109.1454 | 2 | (51) |    |    | K.LLQDFDGR.D                                   |    |     |
|      | 555.6000  | 1109.1854 | 2 | (44) |    |    | K.LLQDFDGR.D                                   |    |     |
|      | 555.6300  | 1109.2454 | 2 | 55   |    |    | K.LLQDFDGR.D                                   |    |     |
|      | 599.1300  | 1196.2454 | 2 | 23   |    |    | K.DAGVIAGLNLVLR.I                              |    |     |
|      | 614.5700  | 1227.1254 | 2 | 56   |    |    | K.VEIANDQGNR.T                                 |    |     |
|      | 615.0900  | 1228.1654 | 2 | (6)  |    |    | K.VEIANDQGNR.T                                 |    |     |
|      | 619.5400  | 1237.0654 | 2 | 52   |    |    | K.FGDPVVQSDMK.H + Oxidation (M)                |    |     |
|      | 744.0000  | 1485.9854 | 2 | 90   |    |    | R.TTPSVVAFDTER.L                               |    |     |
|      | 829.6800  | 1657.3454 | 2 | 68   |    |    | K.NQVALNPQNTVFDAK.R                            |    |     |
|      | 830.1000  | 1658.1854 | 2 | (47) |    |    | K.NQVALNPQNTVFDAK.R                            |    |     |
|      | 844.5300  | 1687.0454 | 2 | 80   |    |    | R.IINEPTAAAIYGLDR.T                            |    |     |
| 1162 | 411.1500  | 820.2854  | 2 | 35   | 8  | 7  | R.TFLVGER.V                                    | 17 | 342 |
|      | 543.1100  | 1084.2054 | 2 | 27   |    |    | K.STFVLDEFK.R                                  |    |     |
|      | 559.6700  | 1117.3254 | 2 | 47   |    |    | R.ILGLLDAYLK.T                                 |    |     |
|      | 674.0500  | 1346.0854 | 2 | 78   |    |    | K.ALIAAQYSGAQVR.V                              |    |     |
|      | 722.5900  | 1443.1654 | 2 | 69   |    |    | K.LDPSSEETQLVLR.E                              |    |     |
|      | 524.7700  | 1571.2882 | 3 | 43   |    |    | R.KLDPSSEETQLVLR.E                             |    |     |
|      | 786.4000  | 2356.1782 | 3 | (8)  |    |    | K.AAAPAPEEEMDECEQALAAEPK.A                     |    |     |
|      | 792.0400  | 2373.0982 | 3 | 18   |    |    | K.AAAPAPEEEMDECEQALAAEPK.A + Oxidation (M)     |    |     |
| 705  | 438.6500  | 875.2854  | 2 | 34   | 33 | 23 | K.TFEINPR.H                                    | 30 | 186 |
|      | 438.6900  | 875.3654  | 2 | (22) |    |    | K.TFEINPR.H                                    |    |     |
|      | 460.1800  | 918.3454  | 2 | 16   |    |    | K.NKEIFLR.E                                    |    |     |
|      | 482.2300  | 962.4454  | 2 | 39   |    |    | K.LIINSLYK.N                                   |    |     |
|      | 491.6300  | 981.2454  | 2 | 34   |    |    | K.SGTSEFLNK.M                                  |    |     |
|      | 497.1700  | 992.3254  | 2 | (42) |    |    | R.SGYLLPDTK.A                                  |    |     |
|      | 497.1900  | 992.3654  | 2 | 51   |    |    | R.SGYLLPDTK.A                                  |    |     |
|      | 508.1600  | 1014.3054 | 2 | 30   |    |    | R.GLFDEYGSK.K                                  |    |     |
|      | 524.1200  | 1046.2254 | 2 | 40   |    |    | K.IYFMAGSSR.K + Oxidation (M)                  |    |     |
|      | 524.1500  | 1046.2854 | 2 | (36) |    |    | K.IYFMAGSSR.K + Oxidation (M)                  |    |     |
|      | 541.1900  | 1080.3654 | 2 | 52   |    |    | K.FAFQAENVN.R                                  |    |     |
|      | 543.2700  | 1084.5254 | 2 | 52   |    |    | R.LSLNIDPDAK.V                                 |    |     |
|      | 575.6200  | 1149.2254 | 2 | (20) |    |    | K.EAESSPFVER.L                                 |    |     |
|      | 575.6400  | 1149.2654 | 2 | 34   |    |    | K.EAESSPFVER.L                                 |    |     |
|      | 584.1900  | 1166.3654 | 2 | 24   |    |    | K.EGVKFDSEK.T                                  |    |     |
|      | 594.2600  | 1186.5054 | 2 | (43) |    |    | K.SILFVPTSAPR.G                                |    |     |
|      | 594.2700  | 1186.5254 | 2 | 43   |    |    | K.SILFVPTSAPR.G                                |    |     |
|      | 638.2300  | 1274.4454 | 2 | 60   |    |    | R.ELISNASDALDK.I                               |    |     |
|      | 639.6800  | 1277.3454 | 2 | 34   |    |    | R.KEAESSPFVER.L                                |    |     |
|      | 426.8500  | 1277.5282 | 3 | (26) |    |    | R.KEAESSPFVER.L                                |    |     |
|      | 645.1000  | 1288.1854 | 2 | 18   |    |    | K.DISTNYASQK.K                                 |    |     |
|      | 743.2900  | 1484.5654 | 2 | (67) |    |    | K.GVVSDDDLPLNVSR.E                             |    |     |
|      | 743.3700  | 1484.7254 | 2 | 76   |    |    | K.GVVSDDDLPLNVSR.E                             |    |     |
|      | 763.2300  | 1524.4454 | 2 | 79   |    |    | K.EEASDYLEDTIK.N                               |    |     |
|      | 515.5400  | 1543.5982 | 3 | 34   |    |    | R.ELISNASDALDKIR.L                             |    |     |
|      | 867.6900  | 1733.3654 | 2 | (43) |    |    | -DDEVVDVGTVEEDLGK.S                            |    |     |
|      | 867.7100  | 1733.4054 | 2 | 85   |    |    | -DDEVVDVGTVEEDLGK.S                            |    |     |
|      | 869.2400  | 1736.4654 | 2 | 17   |    |    | K.TETVEEPMEEEEAAK.E + Oxidation (M)            |    |     |
|      | 893.2800  | 1784.5454 | 2 | 72   |    |    | R.EEEAQLDGLNASQIR.E                            |    |     |
|      | 1023.3500 | 2044.6854 | 2 | 83   |    |    | R.LLSLTDENALSGNEELTVK.I                        |    |     |
|      | 1023.8800 | 2045.7454 | 2 | (43) |    |    | R.LLSLTDENALSGNEELTVK.I                        |    |     |
|      | 909.9700  | 2726.8882 | 3 | 83   |    |    | R.TDDEVVQREEEAQLDGLNASQIR.E                    |    |     |
|      | 910.2800  | 2727.8182 | 3 | (66) |    |    | R.TDDEVVQREEEAQLDGLNASQIR.E                    |    |     |
| 1278 | 401.1400  | 800.2654  | 2 | 27   | 20 | 15 | K.TIADIIR.T                                    | 28 | 303 |
|      | 426.1100  | 850.2054  | 2 | 33   |    |    | K.SM <sup>J</sup> IEISR.T + Oxidation (M)      |    |     |
|      | 487.5800  | 973.1454  | 2 | (29) |    |    | K.EILSEVER.N                                   |    |     |
|      | 487.6300  | 973.2454  | 2 | 31   |    |    | K.EILSEVER.N                                   |    |     |
|      | 561.6500  | 1121.2854 | 2 | (44) |    |    | K.ALDDMISTLK.K + Oxidation (M)                 |    |     |
|      | 561.6600  | 1121.3054 | 2 | 46   |    |    | K.ALDDMISTLK.K + Oxidation (M)                 |    |     |
|      | 563.0200  | 1124.0254 | 2 | 14   |    |    | K.MVQFEENGR.K + Oxidation (M)                  |    |     |
|      | 583.6500  | 1165.2854 | 2 | (31) |    |    | R.AVAQALEVIPR.T                                |    |     |
|      | 583.7200  | 1165.4254 | 2 | 62   |    |    | R.AVAQALEVIPR.T                                |    |     |
|      | 593.2200  | 1184.4254 | 2 | 68   |    |    | K.TAVETAVLLLR.I                                |    |     |
|      | 624.6000  | 1247.1854 | 2 | 57   |    |    | K.GESQTDIEITR.E                                |    |     |
|      | 624.6200  | 1247.2254 | 2 | (48) |    |    | K.GESQTDIEITR.E                                |    |     |
|      | 625.6800  | 1249.3454 | 2 | 35   |    |    | R.KALDDMISTLK.K + Oxidation (M)                |    |     |
|      | 640.2000  | 1278.3854 | 2 | 51   |    |    | R.IVLLDSSLEYK.K                                |    |     |

|      |           |           |   |      |    |    |  |                                              |    |     |  |
|------|-----------|-----------|---|------|----|----|--|----------------------------------------------|----|-----|--|
|      | 459.7800  | 1376.3182 | 3 | 46   |    |    |  | K.KGESQTDIEITR.E                             |    |     |  |
|      | 702.0400  | 1402.0654 | 2 | 18   |    |    |  | K.GISDLAQHYLMR.A                             |    |     |  |
|      | 708.6800  | 1415.3454 | 2 | 56   |    |    |  | R.EDDVGAGLLEIK.K                             |    |     |  |
|      | 726.8000  | 2177.3782 | 3 | 62   |    |    |  | K.MLLDPMGGIVMTNDGNAILR.E + 3 Oxidation (M)   |    |     |  |
|      | 1090.1400 | 2178.2654 | 2 | (8)  |    |    |  | K.MLLDPMGGIVMTNDGNAILR.E + 3 Oxidation (M)   |    |     |  |
|      | 880.2100  | 2637.6082 | 3 | 43   |    |    |  | K.ISIPVDSIDSDMLNINISITTK.A + 2 Oxidation (M) |    |     |  |
| 1469 | 422.5900  | 843.1654  | 2 | 20   | 18 | 12 |  | R.LVGISSR.D                                  | 21 | 346 |  |
|      | 482.1000  | 962.1854  | 2 | 39   |    |    |  | R.VRDVFEAK.A                                 |    |     |  |
|      | 486.5500  | 971.0854  | 2 | 28   |    |    |  | K.EANEILQR.S                                 |    |     |  |
|      | 486.6000  | 971.1854  | 2 | (28) |    |    |  | K.EANEILQR.S                                 |    |     |  |
|      | 486.6300  | 971.2454  | 2 | (27) |    |    |  | K.EANEILQR.S                                 |    |     |  |
|      | 531.0500  | 1060.0854 | 2 | 19   |    |    |  | R.AMMYSGELK.F + 2 Oxidation (M)              |    |     |  |
|      | 550.8200  | 1099.6254 | 2 | 23   |    |    |  | R.YFSEADKIV.V                                |    |     |  |
|      | 578.6100  | 1155.2054 | 2 | (60) |    |    |  | K.NLIDAGVDALR.V                              |    |     |  |
|      | 578.6100  | 1155.2054 | 2 | 70   |    |    |  | K.NLIDAGVDALR.V                              |    |     |  |
|      | 579.6500  | 1157.2854 | 2 | 60   |    |    |  | K.VAQGVSGAVQDK.G                             |    |     |  |
|      | 663.1300  | 1324.2454 | 2 | 23   |    |    |  | R.EDLVVAPAGITLK.E                            |    |     |  |
|      | 741.1900  | 1480.3654 | 2 | 106  |    |    |  | K.REDLVAPAGITLK.E                            |    |     |  |
|      | 741.2000  | 1480.3854 | 2 | (80) |    |    |  | K.REDLVAPAGITLK.E                            |    |     |  |
|      | 494.4900  | 1480.4482 | 3 | (48) |    |    |  | K.REDLVAPAGITLK.E                            |    |     |  |
|      | 846.6300  | 1691.2454 | 2 | 61   |    |    |  | K.YEQGFITDPVVLSPK.D                          |    |     |  |
|      | 890.1900  | 1778.3654 | 2 | 87   |    |    |  | K.LPIVNEDELVAIAR.T                           |    |     |  |
|      | 910.5900  | 1819.1654 | 2 | 46   |    |    |  | K.KYEQGFITDPVVLSPK.D                         |    |     |  |
|      | 607.4400  | 1819.2982 | 3 | (36) |    |    |  | K.KYEQGFITDPVVLSPK.D                         |    |     |  |
| 983  | 452.1600  | 902.3054  | 2 | 35   | 20 | 17 |  | K.AESLQVTR.G                                 | 16 | 235 |  |
|      | 487.2300  | 972.4454  | 2 | 33   |    |    |  | K.LLIIGTTSR.K                                |    |     |  |
|      | 500.1400  | 998.2654  | 2 | 43   |    |    |  | K.MIGFSETAK.C + Oxidation (M)                |    |     |  |
|      | 524.1100  | 1046.2054 | 2 | 42   |    |    |  | K.MEIGLPDEK.G + Oxidation (M)                |    |     |  |
|      | 542.0300  | 1082.0454 | 2 | 18   |    |    |  | K.VVNGPEILNK.Y                               |    |     |  |
|      | 551.2800  | 1100.5454 | 2 | 36   |    |    |  | R.KLLIIGTTSR.K                               |    |     |  |
|      | 569.1200  | 1136.2254 | 2 | 55   |    |    |  | K.YVGESEANIR.K                               |    |     |  |
|      | 571.7100  | 1141.4054 | 2 | 32   |    |    |  | R.LLDVVPIGPR.F                               |    |     |  |
|      | 573.1200  | 1144.2254 | 2 | (54) |    |    |  | K.AENSSLNIGK.A                               |    |     |  |
|      | 573.2000  | 1144.3854 | 2 | 60   |    |    |  | K.AENSSLNIGK.A                               |    |     |  |
|      | 604.1200  | 1206.2254 | 2 | 56   |    |    |  | K.LFADAEERQR.R                               |    |     |  |
|      | 624.1800  | 1246.3454 | 2 | 42   |    |    |  | K.DIESMDPSILK.G                              |    |     |  |
|      | 420.8100  | 1259.4082 | 3 | (30) |    |    |  | K.MEIGLPDEKGR.L + Oxidation (M)              |    |     |  |
|      | 420.8700  | 1259.5882 | 3 | 42   |    |    |  | K.MEIGLPDEKGR.L + Oxidation (M)              |    |     |  |
|      | 632.1700  | 1262.3254 | 2 | (38) |    |    |  | K.DIESMDPSILK.G + Oxidation (M)              |    |     |  |
|      | 668.1500  | 1334.2854 | 2 | 58   |    |    |  | R.LFADAEERQR.R                               |    |     |  |
|      | 455.1400  | 1362.3982 | 3 | 18   |    |    |  | K.LFADAEERQR.L                               |    |     |  |
|      | 486.5200  | 1456.5382 | 3 | (39) |    |    |  | R.VLDDGELLVQQT.K.N                           |    |     |  |
|      | 729.2900  | 1456.5654 | 2 | 69   |    |    |  | R.VLDDGELLVQQT.K.N                           |    |     |  |
|      | 583.7600  | 1748.2582 | 3 | 56   |    |    |  | K.VEVDMEKAESLQVTR.G + Oxidation (M)          |    |     |  |
| 781  | 411.1100  | 820.2054  | 2 | 45   | 27 | 25 |  | K.FGEEIAR.L                                  | 26 | 223 |  |
|      | 450.0600  | 898.1054  | 2 | (17) |    |    |  | R.EGLENDLKS + Glu->pyro-Glu (N-term E)       |    |     |  |
|      | 450.1500  | 898.2854  | 2 | 22   |    |    |  | K.FTDLFEK.M                                  |    |     |  |
|      | 459.1200  | 916.2254  | 2 | 27   |    |    |  | R.EGLENDLKS                                  |    |     |  |
|      | 465.6900  | 929.3654  | 2 | 36   |    |    |  | K.DLQQSIAR.E                                 |    |     |  |
|      | 478.2000  | 954.3854  | 2 | 43   |    |    |  | K.EVFPVLAHK.H + Glu->pyro-Glu (N-term E)     |    |     |  |
|      | 487.1600  | 972.3054  | 2 | (31) |    |    |  | K.EVFPVLAHK.H                                |    |     |  |
|      | 487.7200  | 973.4254  | 2 | 45   |    |    |  | R.EILDESLR.L                                 |    |     |  |
|      | 488.2300  | 974.4454  | 2 | 45   |    |    |  | K.ETVLSALS.R.E                               |    |     |  |
|      | 499.1800  | 996.3454  | 2 | 25   |    |    |  | K.ELPELLQR.N                                 |    |     |  |
|      | 499.1800  | 996.3454  | 2 | (24) |    |    |  | K.ELPELLQR.N                                 |    |     |  |
|      | 515.1300  | 1028.2454 | 2 | 39   |    |    |  | R.VDEYVNVK.D                                 |    |     |  |
|      | 522.6600  | 1043.3054 | 2 | 34   |    |    |  | K.SVNFDMTSK.F + Oxidation (M)                |    |     |  |
|      | 532.7200  | 1063.4254 | 2 | 52   |    |    |  | K.LALASLGYEK.S                               |    |     |  |
|      | 559.1400  | 1116.2654 | 2 | 49   |    |    |  | K.SLLSNLDEVK.K                               |    |     |  |
|      | 585.2400  | 1168.4654 | 2 | 31   |    |    |  | K.STPVNVPISQK.F                              |    |     |  |
|      | 623.2400  | 1244.4654 | 2 | 43   |    |    |  | K.SLLSNLDEVK.K.E                             |    |     |  |
|      | 650.2900  | 1298.5654 | 2 | 19   |    |    |  | K.TSEVDLAKPLVK.F                             |    |     |  |
|      | 659.0600  | 1316.1054 | 2 | 9    |    |    |  | R.TPSNELYKPLR.A                              |    |     |  |
|      | 660.7200  | 1319.4254 | 2 | 75   |    |    |  | K.TMQGSEVVNVLK.S + Oxidation (M)             |    |     |  |
|      | 698.7200  | 1395.4254 | 2 | 73   |    |    |  | K.FYNELTEILVR.F                              |    |     |  |
|      | 766.7400  | 1531.4654 | 2 | 72   |    |    |  | R.LLDEEATDNDLR.A                             |    |     |  |
|      | 548.4700  | 1642.3882 | 3 | 41   |    |    |  | K.QSNNEANLREEVLK.N                           |    |     |  |
|      | 864.3100  | 1726.6054 | 2 | 69   |    |    |  | R.SVIEQGGIQTVDQLK.E                          |    |     |  |
|      | 576.5800  | 1726.7182 | 3 | (34) |    |    |  | R.SVIEQGGIQTVDQLK.E                          |    |     |  |
|      | 577.7800  | 1730.3182 | 3 | 17   |    |    |  | R.LLDEEATDNDLRAK.F                           |    |     |  |
|      | 792.3300  | 2373.9682 | 2 | 14   |    |    |  | R.TMPPTKPQPAPPPPPVLPANR.A + Oxidation (M)    |    |     |  |
| 1289 | 405.1300  | 808.2454  | 2 | 24   | 23 | 19 |  | K.DFDTALK.H                                  | 27 | 294 |  |
|      | 414.6000  | 827.1854  | 2 | 40   |    |    |  | R.IGNSYFK.E                                  |    |     |  |
|      | 441.6500  | 881.2854  | 2 | 27   |    |    |  | R.ELIEQLR.N + Glu->pyro-Glu (N-term E)       |    |     |  |
|      | 502.7000  | 1003.3854 | 2 | 57   |    |    |  | K.AAALEFLNR.F                                |    |     |  |
|      | 504.6300  | 1007.2454 | 2 | 36   |    |    |  | K.ALDLDSCK.E                                 |    |     |  |
|      | 509.6100  | 1017.2054 | 2 | 38   |    |    |  | R.LILEQMOK.D + Oxidation (M)                 |    |     |  |
|      | 533.1600  | 1064.3054 | 2 | 23   |    |    |  | R.TLLSDPTYR.E                                |    |     |  |
|      | 558.7100  | 1115.4054 | 2 | 65   |    |    |  | K.LMDVGLIAR.- + Oxidation (M)                |    |     |  |
|      | 566.7300  | 1131.4454 | 2 | 50   |    |    |  | R.KAAALEFLNR.F                               |    |     |  |
|      | 607.6100  | 1213.2054 | 2 | (21) |    |    |  | R.IGNSYFKEEK.Y                               |    |     |  |
|      | 405.4500  | 1213.3282 | 3 | 29   |    |    |  | R.IGNSYFKEEK.Y                               |    |     |  |
|      | 443.1500  | 1326.4282 | 3 | (18) |    |    |  | K.AAALEAMKDYTK.A + Oxidation (M)             |    |     |  |
|      | 664.6100  | 1327.2054 | 2 | 34   |    |    |  | K.AAALEAMKDYTK.A + Oxidation (M)             |    |     |  |
|      | 744.7700  | 1487.5254 | 2 | 54   |    |    |  | R.LAYINPDLALEEK.N                            |    |     |  |
|      | 838.2000  | 1674.3854 | 2 | 44   |    |    |  | K.FMNPFPNPNLYQK.L + 2 Oxidation (M)          |    |     |  |
|      | 601.1100  | 1800.3082 | 3 | 16   |    |    |  | K.ETKPEPMFEEDLPENK.K + Oxidation (M)         |    |     |  |
|      | 601.8000  | 1802.3782 | 3 | 42   |    |    |  | R.KFMNPFPNPNLYQK.L + 2 Oxidation (M)         |    |     |  |
|      | 637.6200  | 1909.8382 | 3 | 6    |    |    |  | -MESGSPMGEVEISRTR.T + 2 Oxidation (M)        |    |     |  |
|      | 643.7800  | 1928.3182 | 3 | 31   |    |    |  | K.ETKPEPMFEEDLPENK.Q + Oxidation (M)         |    |     |  |
|      | 969.1500  | 1936.2854 | 2 | 61   |    |    |  | R.AMADPEVQIMSDPAMR.L + 3 Oxidation (M)       |    |     |  |
|      | 969.1600  | 1936.3054 | 2 | (48) |    |    |  | R.AMADPEVQIMSDPAMR.L + 3 Oxidation (M)       |    |     |  |
|      | 646.4700  | 1936.3882 | 3 | (55) |    |    |  | R.AMADPEVQIMSDPAMR.L + 3 Oxidation (M)       |    |     |  |
|      | 698.4800  | 2092.4182 | 3 | 60   |    |    |  | R.AMADPEVQIMSDPAMR.L + 3 Oxidation (M)       |    |     |  |
| 1236 | 451.1300  | 900.2454  | 2 | 44   | 8  | 8  |  | K.LEAALGEAK.K                                | 16 | 267 |  |
|      | 513.2300  | 1024.4454 | 2 | 10   |    |    |  | K.EGDLIAQAR.L + Glu->pyro-Glu (N-term E)     |    |     |  |
|      | 514.6800  | 1027.3454 | 2 | 46   |    |    |  | R.LADALQELR.A                                |    |     |  |
|      | 583.1300  | 1164.2454 | 2 | 71   |    |    |  | K.AAYEAELGDAR.K                              |    |     |  |
|      | 680.2200  | 1358.4254 | 2 | 69   |    |    |  | R.SGAQASSTPLSPTR.I                           |    |     |  |
|      | 716.2400  | 1430.4654 | 2 | 44   |    |    |  | R.IDLSAQLSLOK.Q                              |    |     |  |
|      | 754.2000  | 1506.3854 | 2 | 71   |    |    |  | R.TALINSTGEEVAMR.K + Oxidation (M)           |    |     |  |
|      | 776.6500  | 1551.2854 | 2 | 12   |    |    |  | K.SNEDQSMGNWQIK.R + Oxidation (M)            |    |     |  |
| 1236 | 509.6300  | 1017.2454 | 2 | 38   | 6  | 5  |  | R.LILEQMOK.D + Oxidation (M)                 |    |     |  |
|      | 558.7500  | 1115.4854 | 2 | 51   |    |    |  | K.LMDVGLIAR.- + Oxidation (M)                |    |     |  |
|      | 744.7200  | 1487.4254 | 2 | 42   |    |    |  | R.LAYINPDLALEEK.N                            |    |     |  |
|      | 543.0200  | 1626.0382 | 2 | 9    |    |    |  | R.VAEVRSLSHSLSR.W                            |    |     |  |
|      | 969.2200  | 1936.4254 | 2 | (47) |    |    |  | R.AMADPEVQIMSDPAMR.L + 3 Oxidation (M)       |    |     |  |
|      | 646.4900  | 1936.4482 | 2 | 66   |    |    |  | R.AMADPEVQIMSDPAMR.L + 3 Oxidation (M)       |    |     |  |
| 1387 | 498.5800  | 995.1454  | 2 | 42   | 12 | 9  |  | K.ASELFSQK.T                                 | 15 | 254 |  |
|      | 498.5900  | 995.1654  | 2 | (29) |    |    |  | K.ASELFSQK.T                                 |    |     |  |
|      | 529.6600  | 1057.3054 | 2 | 44   |    |    |  | K.LEDITYDQR.D                                |    |     |  |

|      |           |           |   |      |    |    |                                         |    |     |
|------|-----------|-----------|---|------|----|----|-----------------------------------------|----|-----|
|      | 609.2000  | 1216.3854 | 2 | 58   |    |    | R.LEVGTETIHK.S                          |    |     |
|      | 651.6700  | 1301.3254 | 2 | 30   |    |    | K.VTQDATPGSALDK.I                       |    |     |
|      | 697.7200  | 1393.4254 | 2 | 46   |    |    | R.TGVAPDVFANMJK.L + Oxidation (M)       |    |     |
|      | 750.2300  | 1498.4454 | 2 | 91   |    |    | K.NSIYSGLEAFGDVK.L                      |    |     |
|      | 503.4700  | 1507.3882 | 3 | (34) |    |    | R.MLLNDFLNDQNR.D + Oxidation (M)        |    |     |
|      | 754.7400  | 1507.4654 | 2 | 70   |    |    | R.MLLNDFLNDQNR.D + Oxidation (M)        |    |     |
|      | 755.2100  | 1508.4054 | 2 | (22) |    |    | R.MLLNDFLNDQNR.D + Oxidation (M)        |    |     |
|      | 510.5000  | 1528.4782 | 3 | 22   |    |    | K.LEDTYFDRDVEK.A                        |    |     |
|      | 584.5000  | 1750.4782 | 3 | 61   |    |    | R.MLLNDFLNDQNRDK.N + Oxidation (M)      |    |     |
| 1464 | 410.5600  | 819.1054  | 2 | (16) | 26 | 13 | R.DLQSSDR.L                             | 26 | 258 |
|      | 410.5600  | 819.1054  | 2 | (17) |    |    | R.DLQSSDR.L                             |    |     |
|      | 410.5900  | 819.1654  | 2 | (16) |    |    | R.DLQSSDR.L                             |    |     |
|      | 410.6300  | 819.2454  | 2 | 20   |    |    | R.DLQSSDR.L                             |    |     |
|      | 412.1200  | 822.2254  | 2 | 15   |    |    | R.EDQIVR.I                              |    |     |
|      | 432.0800  | 862.1454  | 2 | (32) |    |    | K.LPDAYER.L                             |    |     |
|      | 432.0900  | 862.1654  | 2 | (32) |    |    | K.LPDAYER.L                             |    |     |
|      | 432.0900  | 862.1654  | 2 | 32   |    |    | K.LPDAYER.L                             |    |     |
|      | 432.1400  | 862.2654  | 2 | (32) |    |    | K.LPDAYER.L                             |    |     |
|      | 432.1500  | 862.2854  | 2 | (32) |    |    | K.LPDAYER.L                             |    |     |
|      | 441.6600  | 881.3054  | 2 | 15   |    |    | K.QSEPFK.A                              |    |     |
|      | 529.6800  | 1057.3454 | 2 | 26   |    |    | R.IIVEKPFGR.D                           |    |     |
|      | 553.6400  | 1105.2654 | 2 | (40) |    |    | R.GPTEADELMK.R + Oxidation (M)          |    |     |
|      | 553.6400  | 1105.2654 | 2 | 57   |    |    | R.GPTEADELMK.R + Oxidation (M)          |    |     |
|      | 553.6400  | 1105.2654 | 2 | (56) |    |    | R.GPTEADELMK.R + Oxidation (M)          |    |     |
|      | 553.6700  | 1105.3254 | 2 | (40) |    |    | R.GPTEADELMK.R + Oxidation (M)          |    |     |
|      | 566.5700  | 1131.1254 | 2 | 29   |    |    | K.GYLDPTVPR.G                           |    |     |
|      | 574.6800  | 1147.3454 | 2 | 26   |    |    | R.VQPNEAVYK.M                           |    |     |
|      | 632.5600  | 1263.1054 | 2 | (26) |    |    | K.EMVQNLMLVLR.F + 2 Oxidation (M)       |    |     |
|      | 632.6100  | 1263.2054 | 2 | 29   |    |    | K.EMVQNLMLVLR.F + 2 Oxidation (M)       |    |     |
|      | 637.1500  | 1272.2854 | 2 | (43) |    |    | R.GGYDFDFGIIR.D                         |    |     |
|      | 637.1500  | 1272.2854 | 2 | 54   |    |    | R.GGYDFDFGIIR.D                         |    |     |
|      | 832.7700  | 1663.5254 | 2 | 48   |    |    | R.DGLLPENTFIVGYAR.S                     |    |     |
|      | 912.8000  | 1823.5854 | 2 | 28   |    |    | R.LFYLALPPTVYAVTK.N                     |    |     |
|      | 608.8800  | 1823.6182 | 3 | (14) |    |    | R.LFYLALPPTVYAVTK.N                     |    |     |
|      | 964.2200  | 1926.4254 | 2 | 46   |    |    | R.GSTTATFAAVLVYENER.W                   |    |     |
| 675  | 443.1900  | 884.3654  | 2 | 23   | 9  | 7  | K.QILGVIDK.K                            | 11 | 296 |
|      | 615.5600  | 1229.1054 | 2 | 69   |    |    | R.LNQDQLDAVSK.Y                         |    |     |
|      | 615.6200  | 1229.2254 | 2 | (64) |    |    | R.LNQDQLDAVSK.Y                         |    |     |
|      | 642.1600  | 1282.3054 | 2 | 58   |    |    | R.SFMALSQDIQK.T + Oxidation (M)         |    |     |
|      | 660.8200  | 1319.6254 | 2 | 57   |    |    | K.TVLELQYVLDK.L                         |    |     |
|      | 449.4700  | 1345.3882 | 3 | 23   |    |    | K.LVDPERDMSLR.L + Oxidation (M)         |    |     |
|      | 728.1000  | 1454.1854 | 2 | 61   |    |    | K.YQEVNNELEFAK.E                        |    |     |
|      | 728.1600  | 1454.3054 | 2 | (61) |    |    | K.YQEVNNELEFAK.E                        |    |     |
|      | 760.0400  | 1518.0654 | 2 | 75   |    |    | R.QFMAETQFTSGEK.E + Oxidation (M)       |    |     |
| 675  | 406.1800  | 810.3454  | 2 | 42   | 17 | 13 | K.VQQLVPR.R                             | 17 | 203 |
|      | 432.6100  | 863.2054  | 2 | 48   |    |    | K.ALDFIASK.G                            |    |     |
|      | 546.6400  | 1091.2654 | 2 | 26   |    |    | K.NFITAEELR.R                           |    |     |
|      | 580.1100  | 1158.2054 | 2 | 19   |    |    | K.STLPDADRER.E                          |    |     |
|      | 685.0000  | 1367.9854 | 2 | 43   |    |    | K.GISQEQMQEFR.A + Oxidation (M)         |    |     |
|      | 715.1900  | 1428.3654 | 2 | 63   |    |    | R.TINEVENQILTR.D                        |    |     |
|      | 725.0600  | 1448.1054 | 2 | (17) |    |    | R.LSNRPAPMPSSEK.M + Oxidation (M)       |    |     |
|      | 483.8100  | 1448.4082 | 2 | 32   |    |    | R.LSNRPAPMPSSEK.M + Oxidation (M)       |    |     |
|      | 757.6800  | 1513.3454 | 2 | 69   |    |    | K.LVSGIAEEIVDGNK.M                      |    |     |
|      | 505.4800  | 1513.4182 | 3 | (9)  |    |    | K.LVSGIAEEIVDGNK.M                      |    |     |
|      | 769.1200  | 1536.2254 | 2 | 64   |    |    | R.FAIQDISVEETSAK.E                      |    |     |
|      | 559.1400  | 1674.3982 | 3 | 48   |    |    | K.VLAGDKNFITAEELR.R                     |    |     |
|      | 871.1300  | 1740.2454 | 2 | 63   |    |    | R.ETDTDADQVIASF.K.V                     |    |     |
|      | 581.1300  | 1740.3682 | 3 | (44) |    |    | R.ETDTDADQVIASF.K.V                     |    |     |
|      | 581.1300  | 1740.3682 | 3 | (35) |    |    | R.ETDTDADQVIASF.K.V                     |    |     |
|      | 635.0500  | 1902.1282 | 3 | 18   |    |    | R.KDDPVTNLNNAFEVAEK.Y                   |    |     |
|      | 641.0800  | 1920.2182 | 3 | 20   |    |    | K.AGTQIENIDFRDGLK.L                     |    |     |
| 803  | 472.6700  | 943.3254  | 2 | (16) | 28 | 21 | R.ESIESEIR.R + Glu->pyro-Glu (N-term E) | 26 | 234 |
|      | 474.2100  | 946.4054  | 2 | 46   |    |    | R.KGDFLVR.G                             |    |     |
|      | 481.6200  | 961.2254  | 2 | 28   |    |    | R.ESIESEIR.R                            |    |     |
|      | 481.6500  | 961.2854  | 2 | (28) |    |    | R.ESIESEIR.R                            |    |     |
|      | 501.6900  | 1001.3654 | 2 | 17   |    |    | K.EMVELPLR.H + Oxidation (M)            |    |     |
|      | 516.6600  | 1031.3054 | 2 | 48   |    |    | K.GDDLSTAIK.Q                           |    |     |
|      | 525.1600  | 1048.3054 | 2 | 48   |    |    | K.DVLEFLAK.M                            |    |     |
|      | 534.1900  | 1066.3654 | 2 | 45   |    |    | K.MDELQLFR.G + Oxidation (M)            |    |     |
|      | 538.1700  | 1074.3254 | 2 | 77   |    |    | K.LAGESESNLR.K                          |    |     |
|      | 559.6200  | 1117.2254 | 2 | 18   |    |    | R.ESIESEIRR.E                           |    |     |
|      | 586.7100  | 1171.4054 | 2 | 31   |    |    | R.GILLYGPPGTGK.T                        |    |     |
|      | 621.7200  | 1241.4254 | 2 | 21   |    |    | R.EVDIGIPDATGR.L                        |    |     |
|      | 723.8000  | 1445.5854 | 2 | 76   |    |    | R.IVSQLLTMDGLK.Q + Oxidation (M)        |    |     |
|      | 759.1600  | 1516.3054 | 2 | 57   |    |    | K.YEMFAQTLQQR.G + Oxidation (M)         |    |     |
|      | 778.7600  | 1555.5054 | 2 | 53   |    |    | R.LDQLIPLPDEK.S                         |    |     |
|      | 823.2100  | 1644.4054 | 2 | 70   |    |    | R.KYEMFAQTLQQR.G + Oxidation (M)        |    |     |
|      | 549.1800  | 1644.5182 | 3 | (44) |    |    | R.KYEMFAQTLQQR.G + Oxidation (M)        |    |     |
|      | 856.2500  | 1710.4854 | 2 | (56) |    |    | R.VINQILTEMDSSTK.K + 2 Oxidation (M)    |    |     |
|      | 571.2300  | 1710.6682 | 3 | (34) |    |    | R.VINQILTEMDSSTK.K + 2 Oxidation (M)    |    |     |
|      | 856.7400  | 1711.4654 | 2 | 64   |    |    | R.VINQILTEMDSSTK.K + 2 Oxidation (M)    |    |     |
|      | 600.8300  | 1799.4682 | 3 | 22   |    |    | R.LDQLIPLPDEKSR.V                       |    |     |
|      | 905.8000  | 1809.5854 | 2 | 69   |    |    | K.NAPAIIFIDELDAIPK.R                    |    |     |
|      | 604.5600  | 1810.6582 | 3 | (22) |    |    | K.NAPAIIFIDELDAIPK.R                    |    |     |
|      | 962.1300  | 1922.2454 | 2 | 19   |    |    | R.QAAPCVLFFDELDSIAK.A                   |    |     |
|      | 1085.3000 | 2168.5854 | 2 | 88   |    |    | R.LIVDEAINEDNSVLSQPK.M                  |    |     |
|      | 723.9500  | 2168.8282 | 3 | (36) |    |    | R.LIVDEAINEDNSVLSQPK.M                  |    |     |
|      | 1086.1900 | 2170.3654 | 2 | 42   |    |    | R.QTNPSAMEVEEDDPVEIR.R + Oxidation (M)  |    |     |
|      | 724.8600  | 2171.5582 | 3 | (37) |    |    | R.QTNPSAMEVEEDDPVEIR.R + Oxidation (M)  |    |     |
| 620  | 559.1700  | 1116.3254 | 2 | 53   | 11 | 10 | K.LKETAESVLK.K                          | 14 | 297 |
|      | 567.1400  | 1132.2654 | 2 | 20   |    |    | K.QSLTMDPVVK.S + Oxidation (M)          |    |     |
|      | 620.1600  | 1238.3054 | 2 | 46   |    |    | R.AFSDPFVEAEK.S                         |    |     |
|      | 661.2500  | 1320.4854 | 2 | 87   |    |    | K.VLATAFDTLGGR.K                        |    |     |
|      | 699.6700  | 1397.3254 | 2 | 27   |    |    | K.FLEMCDNLLAR.V + Oxidation (M)         |    |     |
|      | 734.6500  | 1467.2854 | 2 | 34   |    |    | R.EMLNLYENEGK.M + Oxidation (M)         |    |     |
|      | 748.6500  | 1495.2854 | 2 | 51   |    |    | R.AGGIETIANEYSDR.C                      |    |     |
|      | 760.3100  | 1518.6054 | 2 | 66   |    |    | K.ELSTTLNADEAVTR.G                      |    |     |
|      | 760.7500  | 1519.4854 | 2 | (65) |    |    | K.ELSTTLNADEAVTR.G                      |    |     |
|      | 799.7700  | 1597.5254 | 2 | 108  |    |    | R.NFTTEQVTAMLLSK.L + Oxidation (M)      |    |     |
|      | 586.6800  | 1757.0182 | 3 | 11   |    |    | R.LMNETTAAVALAYGIY.Q                    |    |     |
| 620  | 540.1900  | 1078.3654 | 2 | 32   | 6  | 5  | R.AFNDFPIQK.E                           | 6  | 163 |
|      | 560.2300  | 1118.4454 | 2 | 47   |    |    | R.FVVQNVSAQK.D                          |    |     |
|      | 560.2800  | 1118.5454 | 2 | (42) |    |    | R.FVVQNVSAQK.D                          |    |     |
|      | 661.2600  | 1320.5054 | 2 | 24   |    |    | K.VLGTAFDFLGGK.N                        |    |     |
|      | 738.2200  | 1474.4254 | 2 | 72   |    |    | K.DISTTLNADEAVAR.G                      |    |     |
|      | 751.2400  | 1500.4654 | 2 | 57   |    |    | K.VEDVSAVEIVGATRI.I                     |    |     |
| 1130 | 402.6400  | 803.2654  | 2 | 24   | 32 | 23 | K.ITITNDK.G                             | 37 | 264 |
|      | 472.7100  | 943.4054  | 2 | 29   |    |    | K.VCNPIITK.L                            |    |     |
|      | 495.1500  | 988.2854  | 2 | 41   |    |    | R.LSKEDIER.M                            |    |     |
|      | 497.1700  | 992.3254  | 2 | 45   |    |    | K.EIAEAYLGK.T                           |    |     |
|      | 541.1500  | 1080.2854 | 2 | 28   |    |    | K.LLQDFNGK.E                            |    |     |



|           |           |          |      |    |    |    |  |  |                                                             |
|-----------|-----------|----------|------|----|----|----|--|--|-------------------------------------------------------------|
| 600.2100  | 1198.4054 | 2        | 42   |    |    |    |  |  | K.DAGTIAGLNVLR.I                                            |
| 614.6700  | 1227.3254 | 2        | 57   |    |    |    |  |  | K.VEIANDQGNR.T                                              |
| 615.0900  | 1228.1654 | 2        | (19) |    |    |    |  |  | K.VEIANDQGNR.T                                              |
| 627.1700  | 1252.3254 | 2        | 48   |    |    |    |  |  | R.FEELNADLFR.G                                              |
| 635.6100  | 1269.2054 | 2        | 61   |    |    |    |  |  | R.FDDAVVQSDMK.H + Oxidation (M)                             |
| 660.1400  | 1318.2654 | 2        | 72   |    |    |    |  |  | K.NSLESYAFNMK.A + Oxidation (M)                             |
| 660.1400  | 1318.2654 | 2        | (60) |    |    |    |  |  | K.NSLESYAFNMK.A + Oxidation (M)                             |
| 660.6100  | 1319.2054 | 2        | (44) |    |    |    |  |  | K.NSLESYAFNMK.A + Oxidation (M)                             |
| 476.3800  | 1426.1182 | 3        | 36   |    |    |    |  |  | R.RFDDAVVQSDMK.H + Oxidation (M)                            |
| 482.1200  | 1443.3382 | 3        | 12   |    |    |    |  |  | K.ELEKVCNPITK.L                                             |
| 494.1800  | 1479.5182 | 3        | 41   |    |    |    |  |  | R.ARFEELNADLFR.G                                            |
| 744.2100  | 1486.4054 | 2        | 77   |    |    |    |  |  | R.TTPSVVAFDTER.L                                            |
| 522.7900  | 1565.3482 | 3        | 44   |    |    |    |  |  | K.LLQDFNFKELNK.S                                            |
| 816.6800  | 1631.3454 | 2        | 61   |    |    |    |  |  | K.SFYPEVSSMVLTK.M + Oxidation (M)                           |
| 830.2700  | 1658.5254 | 2        | 80   |    |    |    |  |  | R.IINEPTAAAIAYGLDK.K                                        |
| 554.1200  | 1659.3382 | 3        | (50) |    |    |    |  |  | R.IINEPTAAAIAYGLDK.K                                        |
| 555.7500  | 1664.2282 | 3        | (35) |    |    |    |  |  | K.NQVAMNPTNTVFDK.R + Oxidation (M)                          |
| 833.3700  | 1664.7254 | 2        | 71   |    |    |    |  |  | K.NQVAMNPTNTVFDK.R + Oxidation (M)                          |
| 833.7000  | 1665.3854 | 2        | (40) |    |    |    |  |  | K.NQVAMNPTNTVFDK.R + Oxidation (M)                          |
| 894.2200  | 1786.4254 | 2        | 57   |    |    |    |  |  | R.IINEPTAAAIAYGLDK.V                                        |
| 596.5200  | 1786.5382 | 3        | (27) |    |    |    |  |  | R.IINEPTAAAIAYGLDK.V                                        |
| 991.2600  | 1980.5054 | 2        | (36) |    |    |    |  |  | K.TVTNAVVTVPAYFNSQR.Q                                       |
| 661.1900  | 1980.5482 | 3        | 41   |    |    |    |  |  | K.TVTNAVVTVPAYFNSQR.Q                                       |
| 1130.3200 | 2258.6254 | 2        | 77   |    |    |    |  |  | K.SINPDEAVAYGAAVQAAILSGDK.S                                 |
| 753.9300  | 2258.7682 | 3        | (50) |    |    |    |  |  | K.SINPDEAVAYGAAVQAAILSGDK.S                                 |
| 1130.7900 | 2259.5654 | 2        | (44) |    |    |    |  |  | K.SINPDEAVAYGAAVQAAILSGDK.S                                 |
| 1126.8600 | 3377.5582 | 3        | 17   |    |    |    |  |  | K.LYQSAGGMPPGMPGGFPGGGAPPSSGGASSGPTIEVD.- + 2 Oxidation (M) |
| 670       | 450.6300  | 899.2454 | 2    | 43 | 19 | 10 |  |  | R.LVSVLQNK.M                                                |
| 450.7000  | 899.3854  | 2        | (29) |    |    |    |  |  | R.LVSVLQNK.M                                                |
| 450.7000  | 899.3854  | 2        | (27) |    |    |    |  |  | R.LVSVLQNK.M                                                |
| 704.6300  | 1407.2454 | 2        | (40) |    |    |    |  |  | R.AVFDETYDPVPR.V                                            |
| 704.6700  | 1407.3254 | 2        | 54   |    |    |    |  |  | R.AVFDETYDPVPR.V                                            |
| 717.5600  | 1433.1054 | 2        | 100  |    |    |    |  |  | K.AEEIANEMIEAAK.A + Oxidation (M)                           |
| 717.6400  | 1433.2654 | 2        | (59) |    |    |    |  |  | K.AEEIANEMIEAAK.A + Oxidation (M)                           |
| 479.0400  | 1434.0982 | 3        | (6)  |    |    |    |  |  | K.AEEIANEMIEAAK.A + Oxidation (M)                           |
| 738.7500  | 1475.4854 | 2        | 83   |    |    |    |  |  | K.DIINEEVQFLK.T                                             |
| 749.6200  | 1497.2254 | 2        | 82   |    |    |    |  |  | K.VGAEDADGIDMAYR.V + Oxidation (M)                          |
| 749.6300  | 1497.2454 | 2        | (78) |    |    |    |  |  | K.VGAEDADGIDMAYR.V + Oxidation (M)                          |
| 756.0900  | 1510.1654 | 2        | 77   |    |    |    |  |  | K.GLVVDMDFGFEER.K + Oxidation (M)                           |
| 756.1500  | 1510.2854 | 2        | (64) |    |    |    |  |  | K.GLVVDMDFGFEER.K + Oxidation (M)                           |
| 521.4800  | 1561.4182 | 3        | 57   |    |    |    |  |  | K.KAEIENEMIEAAK.A + Oxidation (M)                           |
| 521.7700  | 1562.2882 | 3        | (25) |    |    |    |  |  | K.KAEIENEMIEAAK.A + Oxidation (M)                           |
| 571.8700  | 1712.5882 | 3        | 71   |    |    |    |  |  | R.TITVALADGGRPDNTGR.G                                       |
| 572.1500  | 1713.4282 | 3        | (70) |    |    |    |  |  | R.TITVALADGGRPDNTGR.G                                       |
| 938.7400  | 1875.4654 | 2        | 29   |    |    |    |  |  | K.MALELLTQEGPIER.L + Oxidation (M)                          |
| 835.2200  | 2502.6382 | 3        | 64   |    |    |    |  |  | K.QFIDSNPNQVLVILEMESGASAK.A + Oxidation (M)                 |
| 594       | 407.1500  | 812.2854 | 2    | 32 | 25 | 17 |  |  | K.NILGGVK.A                                                 |
| 492.6100  | 983.2054  | 2        | 28   |    |    |    |  |  | R.DEFGLFK.Q                                                 |
| 625.6100  | 1249.2054 | 2        | (37) |    |    |    |  |  | R.AENYDIPSADR.H                                             |
| 625.6300  | 1249.2454 | 2        | 39   |    |    |    |  |  | R.AENYDIPSADR.H                                             |
| 630.2700  | 1258.5254 | 2        | 56   |    |    |    |  |  | R.LQTSSVLVSLGR.G                                            |
| 630.2700  | 1258.5254 | 2        | (49) |    |    |    |  |  | R.LQTSSVLVSLGR.G                                            |
| 652.6000  | 1303.1854 | 2        | 54   |    |    |    |  |  | R.LDQPMTEIVSR.V + Oxidation (M)                             |
| 652.6500  | 1303.2854 | 2        | (46) |    |    |    |  |  | R.LDQPMTEIVSR.V + Oxidation (M)                             |
| 457.5300  | 1369.5682 | 3        | 23   |    |    |    |  |  | K.ATLPSDKLPGFK.M                                            |
| 723.1700  | 1444.3254 | 2        | 32   |    |    |    |  |  | K.DNPGVVTCLDEAR.H                                           |
| 782.7100  | 1563.4054 | 2        | 5    |    |    |    |  |  | -MRSLPQMSSPSLX.K + Oxidation (M)                            |
| 530.5200  | 1588.5382 | 3        | (20) |    |    |    |  |  | K.ERLDQPMTEIVSR.V + Oxidation (M)                           |
| 530.6200  | 1588.8382 | 3        | 21   |    |    |    |  |  | K.ERLDQPMTEIVSR.V + Oxidation (M)                           |
| 808.7400  | 1615.4654 | 2        | 40   |    |    |    |  |  | K.QPAENVQYLTDPK.F                                           |
| 541.9200  | 1622.7382 | 3        | (61) |    |    |    |  |  | R.LAGTOPLEVLEAVQR.S                                         |
| 812.3900  | 1622.7654 | 2        | 69   |    |    |    |  |  | R.LAGTOPLEVLEAVQR.S                                         |
| 828.2100  | 1654.4054 | 2        | 74   |    |    |    |  |  | R.YDGQVAVFGSDLQEK.L                                         |
| 828.2100  | 1654.4054 | 2        | (69) |    |    |    |  |  | R.YDGQVAVFGSDLQEK.L                                         |
| 904.7700  | 1807.5254 | 2        | 61   |    |    |    |  |  | R.ALPAVQQNLLDEDLIR.K                                        |
| 942.3100  | 1882.6054 | 2        | (67) |    |    |    |  |  | R.NEEDAELVALAQAVNAR.A                                       |
| 942.3100  | 1882.6054 | 2        | 81   |    |    |    |  |  | R.NEEDAELVALAQAVNAR.A                                       |
| 954.7900  | 1907.5654 | 2        | 47   |    |    |    |  |  | K.SLVASLAEPFVVTDFAK.F                                       |
| 644.9000  | 1931.6782 | 3        | 70   |    |    |    |  |  | R.AAVATFLOSVQVPEFTP.K.S                                     |
| 966.8500  | 1931.6854 | 2        | (47) |    |    |    |  |  | R.AAVATFLOSVQVPEFTP.K.S                                     |
| 646.2000  | 1935.5782 | 3        | 41   |    |    |    |  |  | R.ALPAVQQNLLDEDLIR.L                                        |
| 594       | 408.7400  | 815.4654 | 2    | 21 | 15 | 10 |  |  | R.FIDFFK.R                                                  |
| 450.6300  | 899.2454  | 2        | 46   |    |    |    |  |  | R.LVSVLQNK.M                                                |
| 450.6700  | 899.3254  | 2        | (34) |    |    |    |  |  | R.LVSVLQNK.M                                                |
| 450.6900  | 899.3654  | 2        | (43) |    |    |    |  |  | R.LVSVLQNK.M                                                |
| 704.7000  | 1407.3854 | 2        | 57   |    |    |    |  |  | R.AVFDETYDPVPR.V                                            |
| 717.6300  | 1433.2454 | 2        | 75   |    |    |    |  |  | K.AEEIANEMIEAAK.A + Oxidation (M)                           |
| 717.6400  | 1433.2654 | 2        | (69) |    |    |    |  |  | K.AEEIANEMIEAAK.A + Oxidation (M)                           |
| 738.7200  | 1475.4254 | 2        | 67   |    |    |    |  |  | K.DIINEEVQFLK.T                                             |
| 750.0800  | 1498.1454 | 2        | 72   |    |    |    |  |  | K.VGAEDADGIDMAYR.V + Oxidation (M)                          |
| 756.1400  | 1510.2654 | 2        | 77   |    |    |    |  |  | K.GLVVDMDFGFEER.K + Oxidation (M)                           |
| 571.8100  | 1712.4082 | 3        | 54   |    |    |    |  |  | R.TITVALADGGRPDNTGR.G                                       |
| 857.2200  | 1712.4254 | 2        | (12) |    |    |    |  |  | R.TITVALADGGRPDNTGR.G                                       |
| 938.2900  | 1874.5654 | 2        | 43   |    |    |    |  |  | K.MALELLTQEGPIER.L + Oxidation (M)                          |
| 626.2100  | 1875.6082 | 3        | (30) |    |    |    |  |  | K.MALELLTQEGPIER.L + Oxidation (M)                          |
| 911.7900  | 2732.3482 | 3        | 16   |    |    |    |  |  | K.TKQFIDSNPNQVLVILEMESGASAK.A + Oxidation (M)               |
| 626       | 438.6600  | 875.3054 | 2    | 28 | 29 | 16 |  |  | K.ETAESVLK.K                                                |
| 559.1700  | 1116.3254 | 2        | (7)  |    |    |    |  |  | K.LKETAESVLK.K                                              |
| 559.1700  | 1116.3254 | 2        | 28   |    |    |    |  |  | K.LKETAESVLK.K                                              |
| 559.2400  | 1116.4654 | 2        | (11) |    |    |    |  |  | K.LKETAESVLK.K                                              |
| 559.2900  | 1116.5654 | 2        | (18) |    |    |    |  |  | K.LKETAESVLK.K                                              |
| 567.1300  | 1132.2454 | 2        | (20) |    |    |    |  |  | K.QSLTMDPVVK.S + Oxidation (M)                              |
| 567.1700  | 1132.3254 | 2        | 24   |    |    |    |  |  | K.QSLTMDPVVK.S + Oxidation (M)                              |
| 584.1900  | 1166.3654 | 2        | 27   |    |    |    |  |  | K.MIMQDKLEK.E + 2 Oxidation (M)                             |
| 620.1700  | 1238.3254 | 2        | (21) |    |    |    |  |  | R.AFSDPFVEAEK.S                                             |
| 620.2000  | 1238.3854 | 2        | 44   |    |    |    |  |  | R.AFSDPFVEAEK.S                                             |
| 432.4500  | 1294.3282 | 3        | 41   |    |    |    |  |  | K.QDLPAALEEKPR.N                                            |
| 648.2100  | 1294.4054 | 2        | (6)  |    |    |    |  |  | K.QDLPAALEEKPR.N                                            |
| 648.2100  | 1294.4054 | 2        | (31) |    |    |    |  |  | K.QDLPAALEEKPR.N                                            |
| 432.5400  | 1294.5982 | 3        | (38) |    |    |    |  |  | K.QDLPAALEEKPR.N                                            |
| 661.1700  | 1320.3254 | 2        | (76) |    |    |    |  |  | K.VLATAFDTLLGGR.K                                           |
| 661.2100  | 1320.4054 | 2        | 79   |    |    |    |  |  | K.VLATAFDTLLGGR.K                                           |
| 709.6500  | 1417.2854 | 2        | 55   |    |    |    |  |  | K.NAVEEYVEMR.D + Oxidation (M)                              |
| 709.7200  | 1417.4254 | 2        | (53) |    |    |    |  |  | K.NAVEEYVEMR.D + Oxidation (M)                              |
| 734.7800  | 1467.5454 | 2        | 35   |    |    |    |  |  | R.EMLNLYENEGK.M + Oxidation (M)                             |
| 746.7200  | 1491.4254 | 2        | 78   |    |    |    |  |  | K.EDIYAVEIVGATR.I                                           |
| 748.1600  | 1494.3054 | 2        | (42) |    |    |    |  |  | R.AGGIETIANEYSDR.C                                          |
| 748.1800  | 1494.3454 | 2        | 59   |    |    |    |  |  | R.AGGIETIANEYSDR.C                                          |
| 760.2100  | 1518.4054 | 2        | 55   |    |    |    |  |  | K.ELSTTLNADAVTR.G                                           |
| 799.7300  | 1597.4454 | 2        | 108  |    |    |    |  |  | R.NFTTEQVTA <sub>M</sub> LLSL.L + Oxidation (M)             |
| 887.2300  | 1772.4454 | 2        | 105  |    |    |    |  |  | R.LMNETTAVAYGIVK.Q + Oxidation (M)                          |

|      |           |           |   |      |    |    |                                             |    |     |
|------|-----------|-----------|---|------|----|----|---------------------------------------------|----|-----|
|      | 951.8400  | 1901.6654 | 2 | (66) |    |    | K.SNLAYDIVQLPTGLTGK.V                       |    |     |
|      | 634.9100  | 1901.7082 | 3 | 71   |    |    | K.SNLAYDIVQLPTGLTGK.V                       |    |     |
|      | 952.2900  | 1902.5654 | 2 | (19) |    |    | K.SNLAYDIVQLPTGLTGK.V                       |    |     |
|      | 1122.8600 | 3365.5582 | 3 | 20   |    |    | K.NAEQNGPVDGGDNPQPQAAEQGTDVAVPSDSK.K        |    |     |
| 1053 | 459.6200  | 917.2254  | 2 | 29   | 37 | 27 | K.VLESDLK.K                                 | 37 | 250 |
|      | 493.5900  | 985.1654  | 2 | (19) |    |    | R.LTPEEIER.M                                |    |     |
|      | 493.6000  | 985.1854  | 2 | (24) |    |    | R.LTPEEIER.M                                |    |     |
|      | 493.6300  | 985.2454  | 2 | 25   |    |    | R.LTPEEIER.M                                |    |     |
|      | 523.7200  | 1045.4254 | 2 | 36   |    |    | K.VLESDLK.K.S                               |    |     |
|      | 537.6800  | 1073.3454 | 2 | 32   |    |    | K.ITITNDQNR.L                               |    |     |
|      | 596.0900  | 1190.1654 | 2 | 33   |    |    | K.VVEGERPLTK.D                              |    |     |
|      | 605.6000  | 1209.1854 | 2 | 25   |    |    | K.EFFNGKEPSR.G                              |    |     |
|      | 614.6300  | 1227.2454 | 2 | 58   |    |    | R.VEIHANDQNR.I                              |    |     |
|      | 617.1700  | 1232.3254 | 2 | 45   |    |    | K.DAGTIAGLNVMR.I + Oxidation (M)            |    |     |
|      | 658.6900  | 1315.3654 | 2 | 49   |    |    | R.NELESYAYSLK.N                             |    |     |
|      | 665.1300  | 1328.2454 | 2 | 58   |    |    | R.FEELNMDLFR.S + Oxidation (M)              |    |     |
|      | 690.6500  | 1379.2854 | 2 | (41) |    |    | K.ELEEIVQPIISK.L + Glu->pyro-Glu (N-term E) |    |     |
|      | 699.2900  | 1396.5654 | 2 | 47   |    |    | K.ELEEIVQPIISK.L                            |    |     |
|      | 730.7600  | 1459.5054 | 2 | 50   |    |    | K.SDIDEIVLVGGSTR.I                          |    |     |
|      | 510.1700  | 1527.4882 | 3 | (24) |    |    | R.AKFEELNMDLFR.S + Oxidation (M)            |    |     |
|      | 764.7700  | 1527.5254 | 2 | 69   |    |    | R.AKFEELNMDLFR.S + Oxidation (M)            |    |     |
|      | 514.3800  | 1540.1182 | 3 | 38   |    |    | R.MVNDAEKFAEEDK.K + Oxidation (M)           |    |     |
|      | 776.7600  | 1551.5054 | 2 | 81   |    |    | K.TFAPEEISAMVLT.K.M + Oxidation (M)         |    |     |
|      | 783.7800  | 1565.5454 | 2 | 41   |    |    | R.ITPSYVAFTPEGER.L                          |    |     |
|      | 522.9100  | 1565.7082 | 3 | (22) |    |    | R.ITPSYVAFTPEGER.L                          |    |     |
|      | 530.1900  | 1587.5482 | 3 | 35   |    |    | K.SDIDEIVLVGGSTR.I                          |    |     |
|      | 802.6500  | 1603.2854 | 2 | 18   |    |    | K.TKPYIQVDIGGGQTK.T                         |    |     |
|      | 830.2800  | 1658.5454 | 2 | 94   |    |    | R.IINEPTAAAIAYGLDK.R                        |    |     |
|      | 559.8100  | 1676.4082 | 3 | (40) |    |    | K.NQLTSPNPTVFDAR.R                          |    |     |
|      | 839.2400  | 1676.4654 | 2 | 73   |    |    | K.NQLTSPNPTVFDAR.R                          |    |     |
|      | 839.6600  | 1677.3054 | 2 | (45) |    |    | K.NQLTSPNPTVFDAR.R                          |    |     |
|      | 578.2100  | 1731.6082 | 3 | 32   |    |    | K.KTKPYIQVDIGGGQTK.T                        |    |     |
|      | 605.9000  | 1814.6782 | 3 | (20) |    |    | R.IINEPTAAAIAYGLDKR.E                       |    |     |
|      | 908.7200  | 1815.4254 | 2 | 30   |    |    | R.IINEPTAAAIAYGLDKR.E                       |    |     |
|      | 611.8300  | 1832.4682 | 3 | 34   |    |    | K.NQLTSPNPTVFDAR.R.L                        |    |     |
|      | 612.1500  | 1833.4282 | 3 | (24) |    |    | K.NQLTSPNPTVFDAR.R.L                        |    |     |
|      | 918.8000  | 1835.5854 | 2 | 58   |    |    | K.SQIFSTASDNQPTVTIK.V                       |    |     |
|      | 612.9000  | 1835.6782 | 3 | (25) |    |    | K.SQIFSTASDNQPTVTIK.V                       |    |     |
|      | 655.4700  | 1963.3882 | 3 | 33   |    |    | K.KSQIFSTASDNQPTVTIK.V                      |    |     |
|      | 1088.1800 | 2174.3454 | 2 | (34) |    |    | K.LYGSAGPPPTGEEDTAEKDEL-                    |    |     |
|      | 1088.2500 | 2174.4854 | 2 | 65   |    |    | K.LYGSAGPPPTGEEDTAEKDEL-                    |    |     |
| 1053 | 443.6600  | 885.3054  | 2 | 20   |    |    | R.RISELLR.Y                                 | 10 | 238 |
|      | 576.1600  | 1150.3054 | 2 | 44   |    |    | K.YIDQELNK.T                                |    |     |
|      | 580.7000  | 1159.3854 | 2 | 33   |    |    | K.SIYYITGESK.E                              |    |     |
|      | 621.7300  | 1241.4454 | 2 | 47   |    |    | K.ADLINNLGTIAK.S                            |    |     |
|      | 625.1300  | 1248.2454 | 2 | 35   |    |    | K.EQVANSFVER.V                              |    |     |
|      | 625.1300  | 1248.2454 | 2 | (33) |    |    | K.EQVANSFVER.V                              |    |     |
|      | 683.2300  | 1364.4454 | 2 | 63   |    |    | R.TLTLVDTGIGM.TK.A + Oxidation (M)          |    |     |
|      | 757.2100  | 1512.4054 | 2 | 65   |    |    | R.GVVDSEDLPLNISR.E                          |    |     |
| 697  | 403.6700  | 805.3254  | 2 | 16   | 12 | 11 | R.NGLYVK.T                                  | 11 | 204 |
|      | 436.1600  | 870.3054  | 2 | 47   |    |    | R.IDELEPR.R                                 |    |     |
|      | 437.1500  | 872.2854  | 2 | 40   |    |    | R.LDLEDR.S                                  |    |     |
|      | 442.1000  | 882.1854  | 2 | 21   |    |    | R.AFFAGSQR.F                                |    |     |
|      | 486.7300  | 971.4454  | 2 | 38   |    |    | R.SLLSVNAR.G                                |    |     |
|      | 533.7200  | 1065.4254 | 2 | 41   |    |    | K.NPEPELLVR.W                               |    |     |
|      | 668.1900  | 1334.3654 | 2 | 14   |    |    | R.SGGMERPFVLAR.A + Oxidation (M)            |    |     |
|      | 784.6100  | 1567.2054 | 2 | 47   |    |    | K.DPAEGDGAQPETPR.D                          |    |     |
|      | 849.7300  | 1697.4454 | 2 | 54   |    |    | R.DENSVELTMAEGPYK.I + Oxidation (M)         |    |     |
|      | 654.0900  | 1959.2482 | 3 | 30   |    |    | K.MMDYLQGSGETPQTDVR.W + 2 Oxidation (M)     |    |     |
|      | 980.6700  | 1959.3254 | 2 | (19) |    |    | K.MMDYLQGSGETPQTDVR.W + 2 Oxidation (M)     |    |     |
|      | 718.9700  | 2153.8882 | 3 | 11   |    |    | R.VSQGSKDPAEGDGAQPETPR.D                    |    |     |
| 624  | 540.1600  | 1078.3054 | 2 | (38) | 13 | 10 | R.AFNDFPIQK.E                               | 15 | 211 |
|      | 540.1700  | 1078.3254 | 2 | 41   |    |    | R.AFNDFPIQK.E                               |    |     |
|      | 560.2000  | 1118.3854 | 2 | 55   |    |    | R.FVVQVNSAQK.D                              |    |     |
|      | 584.9300  | 1167.8454 | 2 | 1    |    |    | K.VPSFDTAER.R                               |    |     |
|      | 661.2500  | 1320.4854 | 2 | 48   |    |    | K.VLGTAFDFPLGGK.N                           |    |     |
|      | 721.2000  | 1440.3854 | 2 | 50   |    |    | K.DLLNMVYETEGK.M + Oxidation (M)            |    |     |
|      | 721.2000  | 1440.3854 | 2 | (41) |    |    | K.DLLNMVYETEGK.M + Oxidation (M)            |    |     |
|      | 738.2400  | 1474.4654 | 2 | 73   |    |    | K.DISTTLNADEAVAR.G                          |    |     |
|      | 740.2200  | 1478.4254 | 2 | 54   |    |    | R.AGGIETIANEFSDR.C                          |    |     |
|      | 495.0800  | 1482.2182 | 3 | 20   |    |    | K.QAYVDKLEELMK.I + Oxidation (M)            |    |     |
|      | 751.2600  | 1500.5054 | 2 | 91   |    |    | K.VEDVSAVEIVGGATR.I                         |    |     |
|      | 501.2100  | 1500.6082 | 3 | (7)  |    |    | K.VEDVSAVEIVGGATR.I                         |    |     |
|      | 617.1200  | 1848.3382 | 3 | 11   |    |    | R.LMNDMTAVALNRYGIK.Q + 2 Oxidation (M)      |    |     |
| 388  | 415.7200  | 829.4254  | 2 | 20   | 16 | 14 | K.LVELTQK.L                                 | 9  | 191 |
|      | 421.7100  | 841.4054  | 2 | 42   |    |    | R.LIITQVR.R                                 |    |     |
|      | 449.7000  | 897.3854  | 2 | 27   |    |    | K.IIETPGIR.A                                |    |     |
|      | 452.1900  | 902.3654  | 2 | 29   |    |    | K.GETDLIQK.A                                |    |     |
|      | 452.6900  | 903.3654  | 2 | (16) |    |    | K.IPENIYR.G                                 |    |     |
|      | 452.6900  | 903.3654  | 2 | 22   |    |    | K.IPENIYR.G                                 |    |     |
|      | 549.2200  | 1096.4254 | 2 | 48   |    |    | K.IQEENVIPR.E                               |    |     |
|      | 550.5600  | 1099.1054 | 2 | 34   |    |    | K.EEAYNSLMK.S + Oxidation (M)               |    |     |
|      | 553.1400  | 1104.2654 | 2 | (50) |    |    | R.LDSSAVLDTGK.Y                             |    |     |
|      | 553.1700  | 1104.3254 | 2 | 54   |    |    | R.LDSSAVLDTGK.Y                             |    |     |
|      | 583.1600  | 1164.3054 | 2 | 64   |    |    | K.GFTLNDANSR.L                              |    |     |
|      | 609.1600  | 1216.3054 | 2 | 46   |    |    | K.MFEANIQPNR.V + Oxidation (M)              |    |     |
|      | 615.2300  | 1228.4454 | 2 | 58   |    |    | K.GDVENIEVQK.M                              |    |     |
|      | 636.6900  | 1271.3654 | 2 | 54   |    |    | K.TVLDQQTPSR.L                              |    |     |
|      | 692.2600  | 1382.5054 | 2 | 57   |    |    | K.VIEEQLEPAVEK.I                            |    |     |
|      | 848.2300  | 1694.4454 | 2 | 59   |    |    | R.AGDMENAEILTVMR.D + 2 Oxidation (M)        |    |     |
| 603  | 407.7300  | 813.4454  | 2 | 34   | 21 | 17 | K.GSLVAPDR.L                                | 18 | 182 |
|      | 408.6800  | 815.3454  | 2 | 23   |    |    | R.FIDFFK.R                                  |    |     |
|      | 450.7000  | 899.3854  | 2 | (49) |    |    | R.LVSVLQNK.M                                |    |     |
|      | 450.7200  | 899.4254  | 2 | 56   |    |    | R.LVSVLQNK.M                                |    |     |
|      | 473.7100  | 945.4054  | 2 | 46   |    |    | R.SVLGEADQK.G                               |    |     |
|      | 530.6700  | 1059.3254 | 2 | 57   |    |    | R.GLEVTDSPK.Y                               |    |     |
|      | 543.7200  | 1085.4254 | 2 | 52   |    |    | R.IVAVTGAEQK.A                              |    |     |
|      | 547.6500  | 1093.2854 | 2 | 48   |    |    | K.SIDTGMGLER.L + Oxidation (M)              |    |     |
|      | 704.7600  | 1407.5054 | 2 | 42   |    |    | R.AVFDETYDPVR.V                             |    |     |
|      | 717.6600  | 1433.3054 | 2 | 90   |    |    | K.AEEIANEMIEAAK.A + Oxidation (M)           |    |     |
|      | 717.6800  | 1433.3454 | 2 | (65) |    |    | K.AEEIANEMIEAAK.A + Oxidation (M)           |    |     |
|      | 738.7900  | 1475.5654 | 2 | 70   |    |    | K.DIINEEVQFK.T                              |    |     |
|      | 749.6700  | 1497.3254 | 2 | 70   |    |    | K.VGAEDADGIMAYR.V + Oxidation (M)           |    |     |
|      | 756.2100  | 1510.4054 | 2 | 65   |    |    | K.GLVVDMDFEER.K + Oxidation (M)             |    |     |
|      | 521.4900  | 1561.4482 | 3 | (29) |    |    | K.KAEIANEMIEAAK.A + Oxidation (M)           |    |     |
|      | 521.5100  | 1561.5082 | 3 | 49   |    |    | K.KAEIANEMIEAAK.A + Oxidation (M)           |    |     |
|      | 533.8000  | 1598.3782 | 3 | 41   |    |    | K.VDSSSEDKTEFTVK.N                          |    |     |
|      | 533.8100  | 1598.4082 | 3 | (22) |    |    | K.VDSSSEDKTEFTVK.N                          |    |     |
|      | 571.8300  | 1712.4682 | 3 | (57) |    |    | R.TITVALADGGRPDNTGR.G                       |    |     |
|      | 571.8600  | 1712.5582 | 3 | 73   |    |    | R.TITVALADGGRPDNTGR.G                       |    |     |
|      | 835.6300  | 2503.8682 | 3 | 66   |    |    | K.QFIDSNPNQLVILEMESGASAK.A + Oxidation (M)  |    |     |

|     |           |           |   |      |    |    |                                             |    |     |
|-----|-----------|-----------|---|------|----|----|---------------------------------------------|----|-----|
| 401 | 414.7200  | 827.4254  | 2 | 31   | 29 | 21 | R.VQEVLLK.G                                 | 27 | 227 |
|     | 492.6700  | 983.3254  | 2 | 16   |    |    | K.RPLKNDL-                                  |    |     |
|     | 524.1600  | 1046.3054 | 2 | 71   |    |    | R.LAGLFNEQR.K                               |    |     |
|     | 567.6600  | 1133.3054 | 2 | 35   |    |    | R.TLGGLEMELR.L + Oxidation (M)              |    |     |
|     | 572.1000  | 1142.1854 | 2 | 54   |    |    | K.DEPGEQVELK.E                              |    |     |
|     | 630.6600  | 1259.3054 | 2 | 41   |    |    | R.FFGDSAASMAIK.N + Oxidation (M)            |    |     |
|     | 630.6600  | 1259.3054 | 2 | (37) |    |    | R.FFGDSAASMAIK.N + Oxidation (M)            |    |     |
|     | 643.6900  | 1285.3654 | 2 | (19) |    |    | K.EAGMQPQLQIR.G + Oxidation (M)             |    |     |
|     | 643.7500  | 1285.4854 | 2 | 20   |    |    | K.EAGMQPQLQIR.G + Oxidation (M)             |    |     |
|     | 432.5600  | 1294.6582 | 3 | 31   |    |    | K.LPATEKPVLLSK.D                            |    |     |
|     | 674.2200  | 1346.4254 | 2 | 52   |    |    | R.SLAEDFAEQPIK.D                            |    |     |
|     | 754.7200  | 1507.4254 | 2 | 37   |    |    | K.AEAGPEGVAPAPEGEK.K                        |    |     |
|     | 757.1400  | 1512.2654 | 2 | 29   |    |    | R.AEPLNASASDQGEK.V                          |    |     |
|     | 761.2300  | 1520.4454 | 2 | 52   |    |    | R.DAVVYPILVEFTR.E                           |    |     |
|     | 546.1500  | 1635.4282 | 3 | 27   |    |    | K.AEAGPEGVAPAPEGEK.K                        |    |     |
|     | 561.8100  | 1682.4082 | 3 | (38) |    |    | K.AANSLEAFIFETQDK.L                         |    |     |
|     | 842.2500  | 1682.4854 | 2 | (13) |    |    | K.AANSLEAFIFETQDK.L                         |    |     |
|     | 842.2500  | 1682.4854 | 2 | 38   |    |    | K.AANSLEAFIFETQDK.L                         |    |     |
|     | 853.2700  | 1704.5254 | 2 | 23   |    |    | K.DAVITVPVFFNQAER.R                         |    |     |
|     | 868.2500  | 1734.4854 | 2 | 73   |    |    | K.LGNTISSLFGGTTPDAK.E                       |    |     |
|     | 949.8000  | 1897.5854 | 2 | 65   |    |    | K.LYQPEYQEVSTEEQR.E                         |    |     |
|     | 1001.6800 | 2001.3454 | 2 | 30   |    |    | K.EEAEAPVEDGSQPPPEPK.G                      |    |     |
|     | 668.1600  | 2001.4582 | 3 | (8)  |    |    | K.EEAEAPVEDGSQPPPEPK.G                      |    |     |
|     | 668.1800  | 2001.5182 | 3 | (26) |    |    | K.EEAEAPVEDGSQPPPEPK.G                      |    |     |
|     | 1003.6700 | 2005.3254 | 2 | (35) |    |    | K.VIPPAGQTEDAEPISEPEK.V                     |    |     |
|     | 669.4700  | 2005.3882 | 3 | 39   |    |    | K.VIPPAGQTEDAEPISEPEK.V                     |    |     |
|     | 669.5300  | 2005.5682 | 3 | (37) |    |    | K.VIPPAGQTEDAEPISEPEK.V                     |    |     |
|     | 699.2600  | 2094.7582 | 3 | 47   |    |    | K.VLQLINDNTATLSYGVFR.R                      |    |     |
|     | 766.9100  | 2297.7082 | 3 | 42   |    |    | R.LIPEMDQIFTEVEMTTLEK.V + 2 Oxidation (M)   |    |     |
| 410 | 415.6600  | 829.3054  | 2 | 22   | 23 | 19 | K.LVELTQK.L                                 | 14 | 238 |
|     | 432.1100  | 862.2054  | 2 | (15) |    |    | K.LDDLFLK.R                                 |    |     |
|     | 432.1900  | 862.3654  | 2 | 29   |    |    | K.LDDLFLK.R                                 |    |     |
|     | 449.7200  | 897.4254  | 2 | 27   |    |    | K.IIETPGIR.A                                |    |     |
|     | 452.1500  | 902.2854  | 2 | 29   |    |    | K.GETDLIQK.A                                |    |     |
|     | 513.1600  | 1024.3054 | 2 | 23   |    |    | K.FSPTDFLAK.M                               |    |     |
|     | 514.2400  | 1026.4654 | 2 | 34   |    |    | K.LQDAINLK.E                                |    |     |
|     | 514.2900  | 1026.5654 | 2 | (26) |    |    | K.LQDAINLK.E                                |    |     |
|     | 528.6300  | 1055.2454 | 2 | 25   |    |    | K.VYLQNEYK.F                                |    |     |
|     | 549.1500  | 1096.2854 | 2 | 48   |    |    | K.IQEENVIPR.E                               |    |     |
|     | 553.1000  | 1104.1854 | 2 | 58   |    |    | R.LDSSAVLDTGK.Y                             |    |     |
|     | 556.1100  | 1110.2054 | 2 | 23   |    |    | K.GAYDIFLNAK.E                              |    |     |
|     | 583.0700  | 1164.1254 | 2 | 69   |    |    | K.GFTLNDAAANSR.L                            |    |     |
|     | 583.1100  | 1164.2054 | 2 | (63) |    |    | K.GFTLNDAAANSR.L                            |    |     |
|     | 609.1600  | 1216.3054 | 2 | 44   |    |    | K.MEEANIQPNR.V + Oxidation (M)              |    |     |
|     | 615.2300  | 1228.4454 | 2 | 59   |    |    | K.GDVENIEVQK.M                              |    |     |
|     | 636.7500  | 1271.4854 | 2 | 47   |    |    | K.TVLDQQQTPSR.L                             |    |     |
|     | 649.6300  | 1297.2454 | 2 | 73   |    |    | K.DIQEESTFSSR.K                             |    |     |
|     | 692.2200  | 1382.4254 | 2 | 55   |    |    | K.VIEEQLEPAVEK.I                            |    |     |
|     | 696.7900  | 1391.5654 | 2 | 58   |    |    | K.MLNGLEDISGLSK.M + Oxidation (M)           |    |     |
|     | 848.1100  | 1694.2054 | 2 | 62   |    |    | R.AGDMENANILTVMR.D + 2 Oxidation (M)        |    |     |
|     | 565.8000  | 1694.3782 | 3 | (36) |    |    | R.AGDMENANILTVMR.D + 2 Oxidation (M)        |    |     |
|     | 939.7700  | 1877.5254 | 2 | 52   |    |    | K.TVQLTSSELESTLETK.A                        |    |     |
| 414 | 414.6600  | 827.3054  | 2 | (33) | 48 | 25 | R.VQEVLLK.A                                 | 35 | 204 |
|     | 414.6700  | 827.3254  | 2 | (22) |    |    | R.VQEVLLK.A                                 |    |     |
|     | 414.6900  | 827.3654  | 2 | 33   |    |    | R.VQEVLLK.A                                 |    |     |
|     | 414.7300  | 827.4454  | 2 | (16) |    |    | R.VQEVLLK.A                                 |    |     |
|     | 414.7500  | 827.4854  | 2 | (22) |    |    | R.VQEVLLK.A                                 |    |     |
|     | 503.6600  | 1005.3054 | 2 | 26   |    |    | R.EVQYLLNK.A                                |    |     |
|     | 524.1200  | 1046.2254 | 2 | 70   |    |    | R.LAGLFNEQR.K                               |    |     |
|     | 524.1500  | 1046.2854 | 2 | (61) |    |    | R.LAGLFNEQR.K                               |    |     |
|     | 524.2400  | 1046.4654 | 2 | (51) |    |    | R.LAGLFNEQR.K                               |    |     |
|     | 567.6900  | 1133.3654 | 2 | 35   |    |    | R.TLGGLEMELR.L + Oxidation (M)              |    |     |
|     | 567.7200  | 1133.4254 | 2 | (35) |    |    | R.TLGGLEMELR.L + Oxidation (M)              |    |     |
|     | 572.1300  | 1142.2454 | 2 | 34   |    |    | K.DEPGEQVELK.E                              |    |     |
|     | 630.6800  | 1259.3454 | 2 | 44   |    |    | R.FFGDSAASMAIK.N + Oxidation (M)            |    |     |
|     | 643.6300  | 1285.2454 | 2 | (23) |    |    | K.EAGMQPQLQIR.G + Oxidation (M)             |    |     |
|     | 643.7100  | 1285.4054 | 2 | (17) |    |    | K.EAGMQPQLQIR.G + Oxidation (M)             |    |     |
|     | 643.7300  | 1285.4454 | 2 | (23) |    |    | K.EAGMQPQLQIR.G + Oxidation (M)             |    |     |
|     | 643.7300  | 1285.4454 | 2 | 27   |    |    | K.EAGMQPQLQIR.G + Oxidation (M)             |    |     |
|     | 432.5300  | 1294.5682 | 2 | 34   |    |    | K.LPATEKPVLLSK.D                            |    |     |
|     | 674.2200  | 1346.4254 | 2 | 58   |    |    | R.SLAEDFAEQPIK.D                            |    |     |
|     | 754.7100  | 1507.4054 | 2 | (37) |    |    | K.AEAGPEGVAPAPEGEK.K                        |    |     |
|     | 503.4900  | 1507.4482 | 3 | (32) |    |    | K.AEAGPEGVAPAPEGEK.K                        |    |     |
|     | 503.4900  | 1507.4482 | 3 | (29) |    |    | K.AEAGPEGVAPAPEGEK.K                        |    |     |
|     | 754.7700  | 1507.5254 | 2 | 41   |    |    | K.AEAGPEGVAPAPEGEK.K                        |    |     |
|     | 757.1800  | 1512.3454 | 2 | 40   |    |    | R.AEPLNASASDQGEK.V                          |    |     |
|     | 761.3000  | 1520.5854 | 2 | (52) |    |    | R.DAVVYPILVEFTR.E                           |    |     |
|     | 507.9200  | 1520.7382 | 3 | 54   |    |    | R.DAVVYPILVEFTR.E                           |    |     |
|     | 546.1800  | 1635.5182 | 3 | 25   |    |    | K.AEAGPEGVAPAPEGEK.K                        |    |     |
|     | 842.2800  | 1682.5454 | 2 | 60   |    |    | K.AANSLEAFIFETQDK.L                         |    |     |
|     | 574.9300  | 1721.7682 | 3 | 58   |    |    | K.VAIVKPGVPMIEVLNK.E + Oxidation (M)        |    |     |
|     | 868.2900  | 1734.5654 | 2 | 65   |    |    | K.LGNTISSLFGGTTPDAK.E                       |    |     |
|     | 668.1400  | 2001.3982 | 2 | (21) |    |    | K.EEAEAPVEDGSQPPPEPK.G                      |    |     |
|     | 1001.7500 | 2001.4854 | 2 | (40) |    |    | K.EEAEAPVEDGSQPPPEPK.G                      |    |     |
|     | 1001.7700 | 2001.5254 | 2 | (37) |    |    | K.EEAEAPVEDGSQPPPEPK.G                      |    |     |
|     | 668.1900  | 2001.5482 | 3 | 41   |    |    | K.EEAEAPVEDGSQPPPEPK.G                      |    |     |
|     | 1003.7700 | 2005.5254 | 2 | 47   |    |    | K.VIPPAGQTEDAEPISEPEK.V                     |    |     |
|     | 1003.7700 | 2005.5254 | 2 | (43) |    |    | K.VIPPAGQTEDAEPISEPEK.V                     |    |     |
|     | 669.5400  | 2005.5982 | 3 | (45) |    |    | K.VIPPAGQTEDAEPISEPEK.V                     |    |     |
|     | 669.5400  | 2005.5982 | 3 | (32) |    |    | K.VIPPAGQTEDAEPISEPEK.V                     |    |     |
|     | 698.8500  | 2093.5282 | 3 | 63   |    |    | K.NINADAAAAAGAVYQAAALS.K + Oxidation (M)    |    |     |
|     | 1047.8100 | 2093.6054 | 2 | 80   |    |    | K.VLQLINDNTATLSYGVFR.R                      |    |     |
|     | 1149.8300 | 2297.6454 | 2 | 55   |    |    | R.LIPEMDQIFTEVEMTTLEK.V + 2 Oxidation (M)   |    |     |
|     | 766.9200  | 2297.7382 | 3 | (38) |    |    | R.LIPEMDQIFTEVEMTTLEK.V + 2 Oxidation (M)   |    |     |
|     | 767.2500  | 2298.7282 | 3 | (34) |    |    | R.LIPEMDQIFTEVEMTTLEK.V + 2 Oxidation (M)   |    |     |
|     | 781.1800  | 2340.5182 | 3 | (21) |    |    | R.VESVFETLVDSAEESTLTK.L                     |    |     |
|     | 781.1800  | 2340.5182 | 3 | 23   |    |    | R.VESVFETLVDSAEESTLTK.L                     |    |     |
|     | 846.2700  | 2535.7882 | 3 | 9    |    |    | K.TVLSANADHMAQIEGLMDDVDFK.A + Oxidation (M) |    |     |
|     | 865.1900  | 2592.5482 | 3 | 24   |    |    | K.VETAGSEPGDTEPLELGGPAAEPEQK.E              |    |     |
|     | 1042.9300 | 3125.7682 | 3 | 32   |    |    | K.DEPGEQVELKEAEAPVEDGSQPPPEPK.G             |    |     |
| 608 | 407.6200  | 813.2254  | 2 | 18   | 14 | 11 | K.GSLVAPDR.L                                | 12 | 201 |
|     | 450.6800  | 899.3454  | 2 | (28) |    |    | R.LVSVLQNK.M                                |    |     |
|     | 450.7200  | 899.4254  | 2 | 39   |    |    | R.LVSVLQNK.M                                |    |     |
|     | 473.6700  | 945.3254  | 2 | 46   |    |    | R.SVLGEADQK.G                               |    |     |
|     | 530.6600  | 1059.3054 | 2 | 56   |    |    | R.GLEVTDSPK.Y                               |    |     |
|     | 543.7300  | 1085.4454 | 2 | 59   |    |    | R.IVAVTGAEAQK.A                             |    |     |
|     | 547.6300  | 1093.2454 | 2 | 54   |    |    | K.SIDTGMGLER.L + Oxidation (M)              |    |     |
|     | 704.6700  | 1407.3254 | 2 | (14) |    |    | R.AVFDETYDPVR.V                             |    |     |
|     | 704.6700  | 1407.3254 | 2 | 64   |    |    | R.AVFDETYDPVR.V                             |    |     |
|     | 749.5900  | 1497.1654 | 2 | 63   |    |    | K.VGAEDAGDIMAAYR.V + Oxidation (M)          |    |     |
|     | 756.1900  | 1510.3654 | 2 | 66   |    |    | K.GLVVDMDGFEEER.K + Oxidation (M)           |    |     |

|     |           |           |   |      |    |    |  |                                                        |    |     |
|-----|-----------|-----------|---|------|----|----|--|--------------------------------------------------------|----|-----|
|     | 521.5500  | 1561.6282 | 3 | 27   |    |    |  | K.KAEI <del>A</del> NEMIEAAK.A + Oxidation (M)         |    |     |
|     | 521.5500  | 1561.6282 | 3 | (17) |    |    |  | K.KAEI <del>A</del> NEMIEAAK.A + Oxidation (M)         |    |     |
|     | 533.8400  | 1598.4982 | 3 | 17   |    |    |  | K.VDSS <del>E</del> DKTEFTVYK.N                        |    |     |
| 413 | 414.6500  | 827.2854  | 2 | 30   | 22 | 19 |  | R.VQEVLLK.A                                            | 25 | 220 |
|     | 414.7300  | 827.4454  | 2 | (25) |    |    |  | R.VQEVLLK.A                                            |    |     |
|     | 524.2000  | 1046.3854 | 2 | 58   |    |    |  | R.LAGLFNEQR.K                                          |    |     |
|     | 567.7200  | 1133.4254 | 2 | 35   |    |    |  | R.TLGGLE <del>M</del> ELR.L + Oxidation (M)            |    |     |
|     | 572.1400  | 1142.2654 | 2 | 30   |    |    |  | K.DEPGEQVELK.E                                         |    |     |
|     | 643.6400  | 1285.2654 | 2 | 17   |    |    |  | K.EAG <del>M</del> QPQLQIR.G + Oxidation (M)           |    |     |
|     | 432.6100  | 1294.8082 | 3 | 48   |    |    |  | K.LPATEKPVLLK.D                                        |    |     |
|     | 674.1800  | 1346.3454 | 2 | 50   |    |    |  | R.SLAEDFAEQPIK.D                                       |    |     |
|     | 754.6900  | 1507.3654 | 2 | 45   |    |    |  | K.AEAGPEGVAPAPEGEK.K                                   |    |     |
|     | 505.8700  | 1514.5882 | 3 | 28   |    |    |  | K.TKEAG <del>M</del> QPQLQIR.G + Oxidation (M)         |    |     |
|     | 761.3000  | 1520.5854 | 2 | 30   |    |    |  | R.DAVVYVILVEFTR.E                                      |    |     |
|     | 546.1700  | 1635.4882 | 3 | 59   |    |    |  | K.AEAGPEGVAPAPEGEK.K                                   |    |     |
|     | 842.2700  | 1682.5254 | 2 | 41   |    |    |  | K.AANSLEAFIFETQDK.L                                    |    |     |
|     | 574.8900  | 1721.6482 | 3 | 59   |    |    |  | K.VAIVKPGV <del>M</del> EIVLNK.E + Oxidation (M)       |    |     |
|     | 868.2300  | 1734.4454 | 2 | 64   |    |    |  | K.LGNTISSLFGGGTPDAK.E                                  |    |     |
|     | 868.6300  | 1735.2454 | 2 | (5)  |    |    |  | K.LGNTISSLFGGGTPDAK.E                                  |    |     |
|     | 668.1100  | 2001.3082 | 3 | 14   |    |    |  | K.EEAEAPVEDGSGPPPEPK.G                                 |    |     |
|     | 1003.7600 | 2005.5054 | 2 | (33) |    |    |  | K.VIPPAGQTEDAEPISEPEK.V                                |    |     |
|     | 669.8400  | 2006.4982 | 3 | 41   |    |    |  | K.VIPPAGQTEDAEPISEPEK.V                                |    |     |
|     | 766.9000  | 2297.6782 | 3 | 35   |    |    |  | R.LIPE <del>M</del> DQIFTEVEMTTLEK.V + 2 Oxidation (M) |    |     |
|     | 789.7900  | 2366.3482 | 3 | 10   |    |    |  | R. <del>M</del> VVEIGVELVLDLDPEDK.L + Oxidation (M)    |    |     |
|     | 841.5500  | 2521.6282 | 3 | 45   |    |    |  | K.VETGSEPGDTEPLELGGPGAEPQK.E                           |    |     |

**Supplemental Table 2S. RTqPCR primers**

| <b>Gene</b>     | <b>Oligonucleotides sequence</b>                                 |
|-----------------|------------------------------------------------------------------|
| <b>SEC24A</b>   | 5' -CTACACCAACGGTCCTGTCC-3'<br>5' -TGGATTAGAGGCCACAGGTG-3'       |
| <b>SAR1B</b>    | 5' -TGGATTAGAGGCCACAGGTG-3'<br>5' -CATGCCAGCAATGGTCAGTT-3'       |
| <b>GAPDH</b>    | 5' -ACCACAGTCCATGCCATCAC-3'<br>5' -TCCACCACCCTGTTGCTGTA-3'       |
| <b>HYOU1</b>    | 5' -GCAGACCTGTTGGCACTGAG-3'<br>5' -TCACGATCACCGGTGTTTTTC-3'      |
| <b>HSPH1</b>    | 5' -CAGTCTCACCATTTGCATCAC-3'<br>5' -CCTCTTGAACAAGCAGTACAG-3'     |
| <b>HSP90AB1</b> | 5' -AGAAATTGCCCAACTCATGTCC-3'<br>5' -ATCAACTCCCGAAGGAAAATCTC-3'  |
| <b>HSPB1</b>    | 5' -TGGACCCACCCAAGTTTTC-3'<br>5' -CGGCAGTCTCATCGGATTTTT-3'       |
| <b>ATP5B</b>    | 5' -AAACAATTTGCTCCCATTCATGC-3'<br>5' -GACAACCTTGATAACCAGTCACC-3' |
| <b>LRPPRC</b>   | 5' -GCTCATAGGATATGGGACACACT-3'<br>5' -CCAGGAAATCAGTTGGTGAGAAT-3' |
| <b>MRI1</b>     | 5' -CAGGAGCTGACCGATGTTAATG-3'<br>5' -CCACCAGTGATGAGGTCGT-3'      |
| <b>EEF1D</b>    | 5' -CCACCAGTGATGAGGTCGT-3'<br>5' -ATCCCAAGGCTTGACATCCAG-3'       |
| <b>EIF4H</b>    | 5' -GCATAAGGAGTGTACGGCTAGT-3'<br>5' -CCATCGTATGTCAAGGCTTCC-3'    |
| <b>EEF1G</b>    | 5' -TGTTTGAGAGCAACGCCATTG-3'<br>5' -ATCGGAATCAGCAAAGCTCAC-3'     |
| <b>ERP29</b>    | 5' -CCTGGATACGGTCACTTTCTACA-3'<br>5' -AGTTTTTCAGCAAGACGCTTGA-3'  |
| <b>COPE</b>     | 5' -CAGAGGAAGTTCGGTGTGGTC-3'<br>5' -GGGCGAGGTAGTCAGCAAAC-3'      |
| <b>RPLP0</b>    | 5' -AGCCCAGAACAACACTGGTCTC-3'<br>5' -ACTCAGGATTTCAATGGTGCC-3'    |
| <b>HSPD1</b>    | 5' -CTACTGTACTGGCACGCTCTA-3'<br>5' -CAACAGCTAACATCACACCTCTC-3'   |
| <b>HSPA1A/B</b> | 5' -GCTTCAAGACTTTGCATTTCC-3'<br>5' -AAAGCAAGTTCAGTACTTCACC-3'    |

**Chip-DNA primers**

|                                        | <b>Oligonucleotides sequence</b>                                   |
|----------------------------------------|--------------------------------------------------------------------|
| <b>SAR1B-SEC24A regulatory element</b> | 5' -TGCTTAAATAGCACAAAGTTC-3'<br>5' -GAAGAGGAAATAGAGCTCAGA-3'       |
| <b>GAPDH exon</b>                      | 5' -CGGAGTCAACGGATTTGGTCGTAT-3'<br>5' -AGCCTTCTCCATGGTGGTGAAGAC-3' |
